# Supplementary material for: The single-cell pathology landscape of breast cancer
Source: Springer Nature journal article supplement (doi:10.1038/s41586-019-1876-x), 2020-01-20
Supplement: 41586_2019_1876_MOESM1_ESM.pdf [file 41586_2019_1876_MOESM1_ESM.pdf]

**Supplementary information**

---

**The single-cell pathology landscape of breast cancer**

---

In the format provided by the authors and unedited

Hartland W. Jackson, Jana R. Fischer, Vito R. T. Zanutelli, H. Raza Ali, Robert Mechera, Savas D. Soysal, Holger Moch, Simone Muenst, Zsuzsanna Varga, Walter P. Weber & Bernd Bodenmiller

## SI Guide

The SI file contains example images from the analyzed cohort and Supplementary Tables 1-9. The Supplementary Tables yield an overview over the clinical and patient information and summarize the output of statistical analyses.

### Supplementary Images:

Supplementary Images 1: Summary example images from different patients of the analyzed cohort; **(top)** 6-color image of representative markers, **(bottom)** same image with single-cells colored by cell type metacluster overlaid with an example **(a)** epithelial or **(b)** microenvironment community type contained frequently in the respective image. Each marker was individually scaled to enable visualization. Scale bar = 100  $\mu\text{m}$ .

Supplementary Images 2: Example images from different patients of the analyzed cohort, each highlighting an individual epithelial or microenvironment community type. Scale bar = 100  $\mu\text{m}$ .

Supplementary Images 3: Example images representing a tumor from each SCP subgroup. **(left)** 6-color image of representative markers, **(right)** same image with single-cells colored by cell type metacluster. Scale bar = 100  $\mu\text{m}$ .

### Supplementary Information Tables:

Supplementary Table 1: Overview of patient clinical metadata for cohort from University Hospital Basel including tumor grade; TNM score (tumor size and invasion, lymph nodal involvement, distant metastasis); overall and disease-free survival; immunohistochemistry classification of ER, PR, and HER2 receptors; and clinical subgroup.

Supplementary Table 2: Antibody conjugates used in staining panel.

Supplementary Table 3: Summary of clinical parameters for each single-cell pathology subgroup.

Supplementary Table 4: **(a-c)** Coxph and **(d-f)** logrank tests for differences in overall survival between each single-cell pathology subgroup and the rest of the patients **(a, d)** in the cohort, **(b, e)** in similar SCP subgroups, and **(c, f)** in the patients clinically categorized as HR<sup>+</sup>/HER2<sup>-</sup>.

Supplementary Table 5: **(a)** Coxph and **(b)** logrank tests for differences between disease-free survival of each single-cell pathology subgroup and the rest of the patients in the cohort.

Supplementary Table 6: **(a)** Coxph and **(b)** logrank tests for differences between overall survival of stromal environment subgroup and the rest of the patients in the cohort.

Supplementary Table 7: **(a)** Coxph and **(b)** logrank tests of differences between disease-free survival of stromal environment subgroup and the rest of the patients in the cohort.

Supplementary Table 8: Likelihood ratio tests between nested coxph models. The null hypothesis is that the larger model (more variables) is not better than the smaller one. P values < 0.05 reject the null hypothesis.

Supplementary Table 9: Overview of patient clinical metadata for cohort from University Hospital Zurich.

# Supplementary Images 1

**a**

## Epithelial Communities

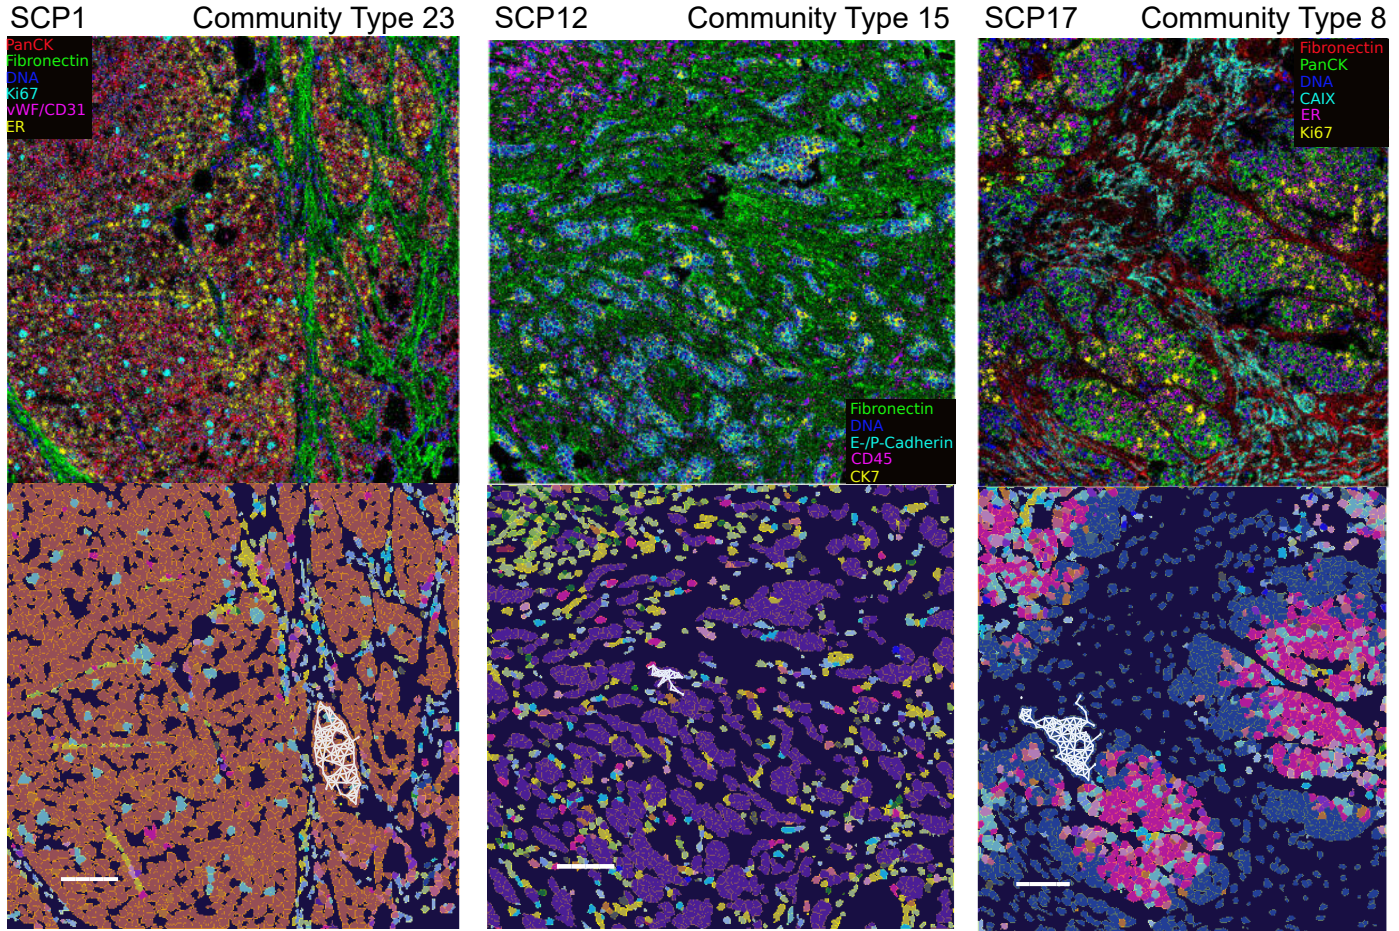

**b**

## Microenvironment Communities

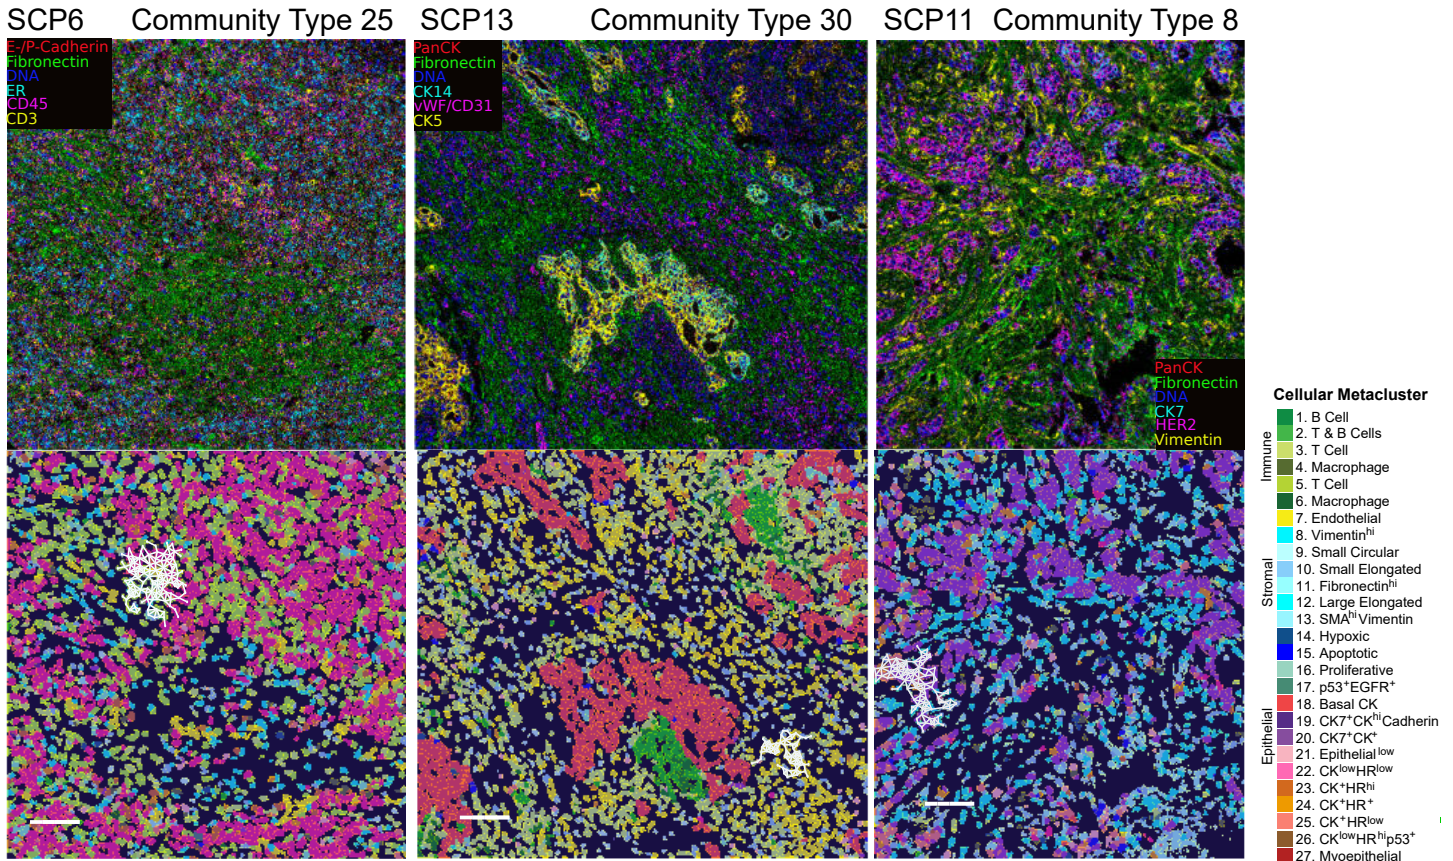

Supplementary Images 1: Summary example images from different patients of the analyzed cohort; (top) 6-color image of representative markers, (bottom) same image with single-cells colored by cell type metacluster overlaid with an example (a) epithelial or (b) microenvironment community type contained frequently in the respective image. Each marker was individually scaled to enable visualization. Scale bar = 100  $\mu$ m.

# Supplementary Images 2

## Epithelial Community Examples

Type 1

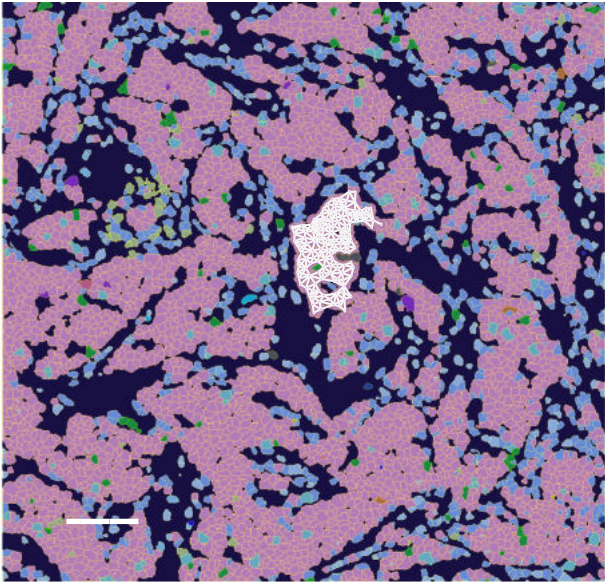

Type 2

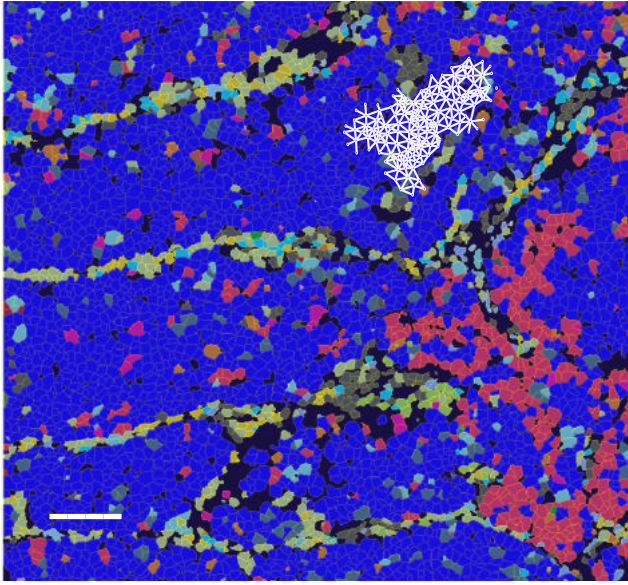

Type 3

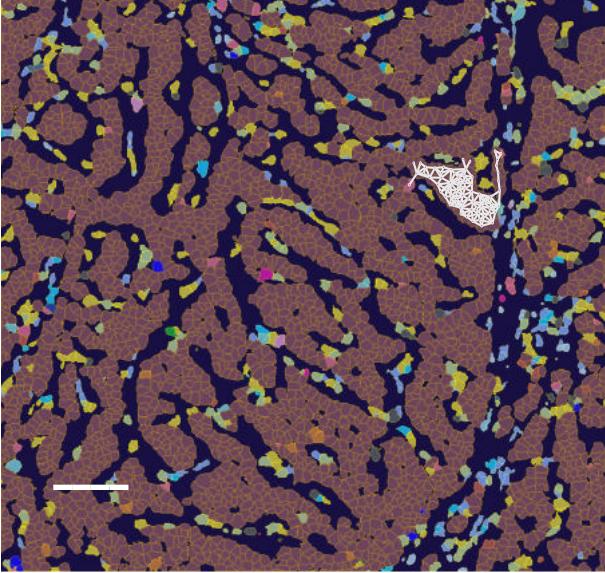

Type 4

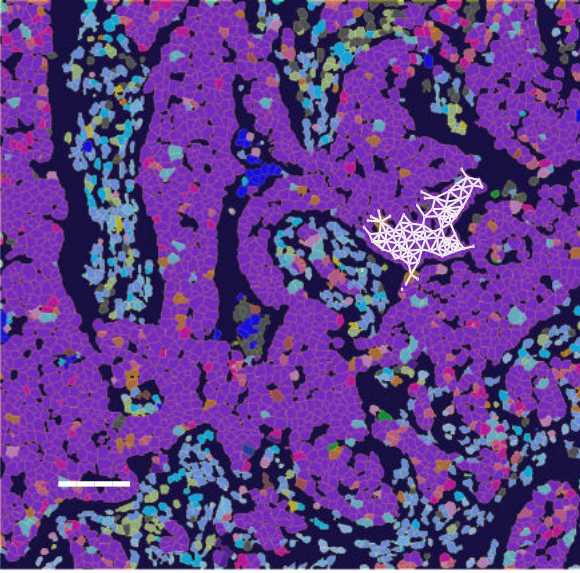

Type 5

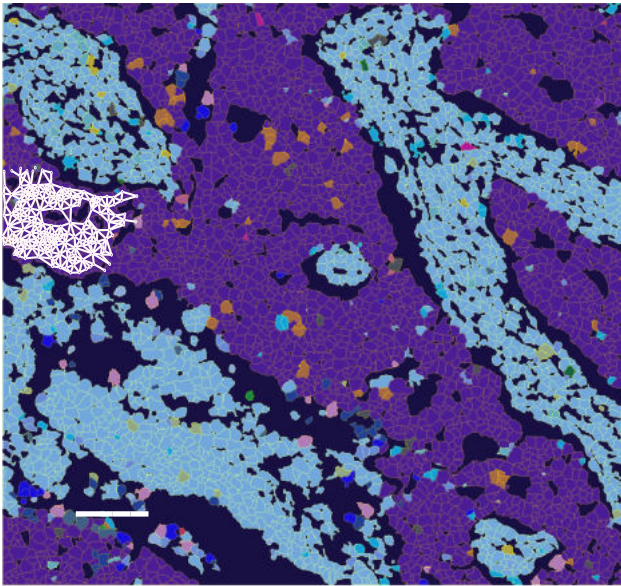

Type 6

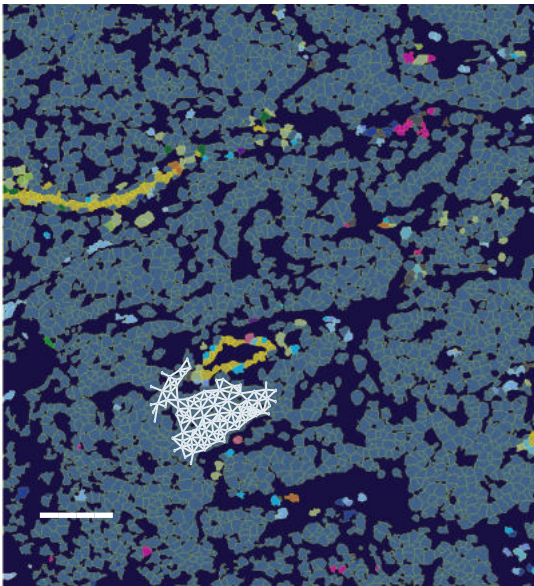

### Cellular Metacluster

- 1. B Cell
- 2. T & B Cells
- 3. T Cell
- 4. Macrophage
- 5. T Cell
- 6. Macrophage
- 7. Endothelial
- 8. Vimentin<sup>hi</sup>
- 9. Small Circular
- 10. Small Elongated
- 11. Fibronectin<sup>hi</sup>
- 12. Large Elongated
- 13. SMA<sup>hi</sup>Vimentin
- 14. Hypoxic
- 15. Apoptotic
- 16. Proliferative
- 17. p53<sup>+</sup>EGFR<sup>+</sup>
- 18. Basal CK
- 19. CK7<sup>+</sup>CK<sup>hi</sup>Cadherin
- 20. CK7<sup>+</sup>CK<sup>+</sup>
- 21. Epithelial<sup>low</sup>
- 22. CK<sup>low</sup>HR<sup>low</sup>
- 23. CK<sup>+</sup>HR<sup>hi</sup>
- 24. CK<sup>+</sup>HR<sup>+</sup>
- 25. CK<sup>+</sup>HR<sup>low</sup>
- 26. CK<sup>low</sup>HR<sup>hi</sup>p53<sup>+</sup>
- 27. Myoepithelial

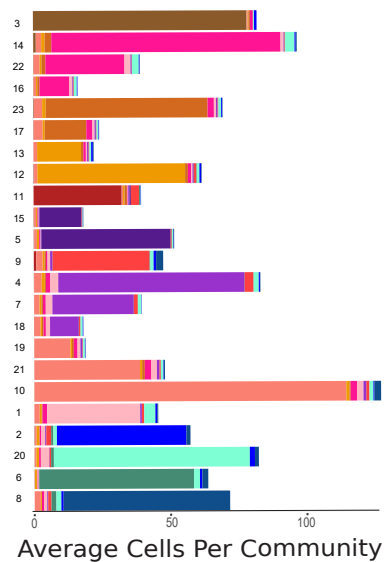

Type 7

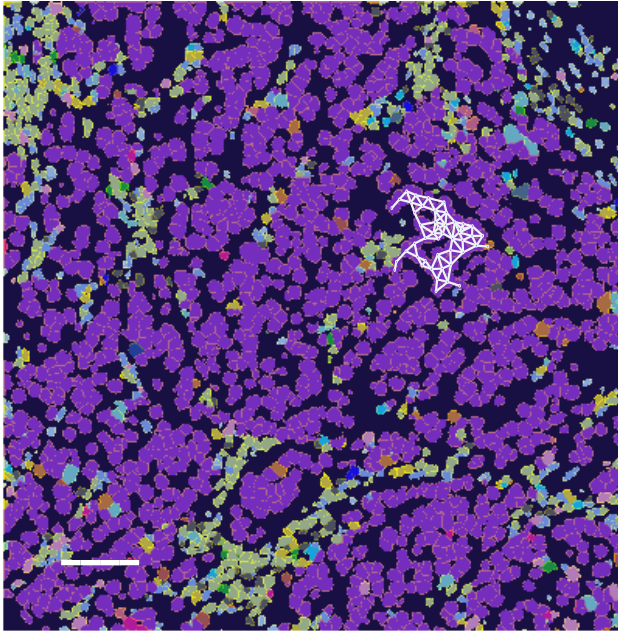

Type 8

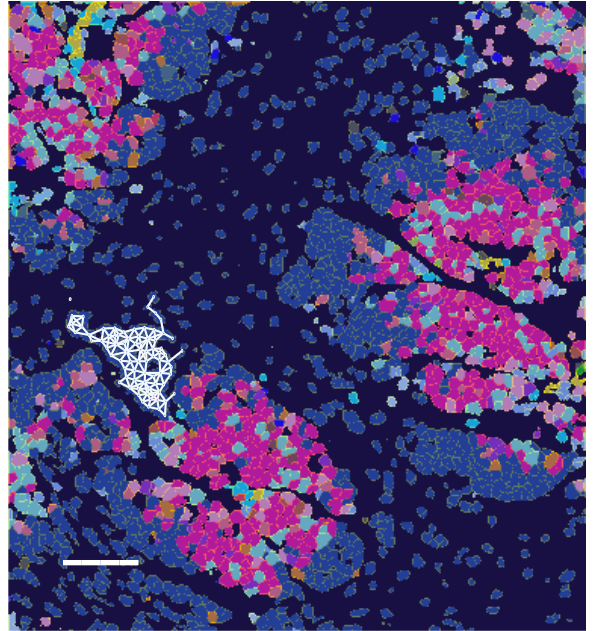

Type 9

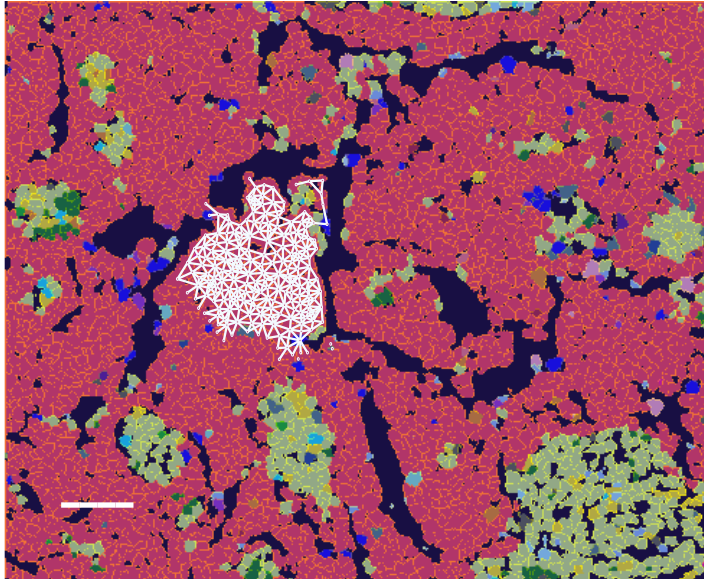

Type 10

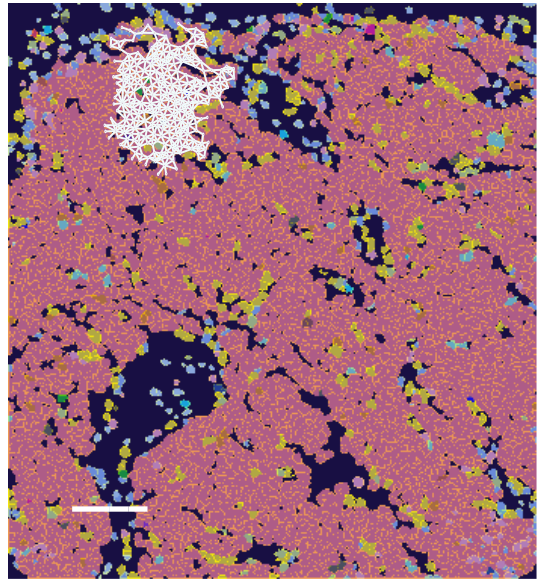

Type 11

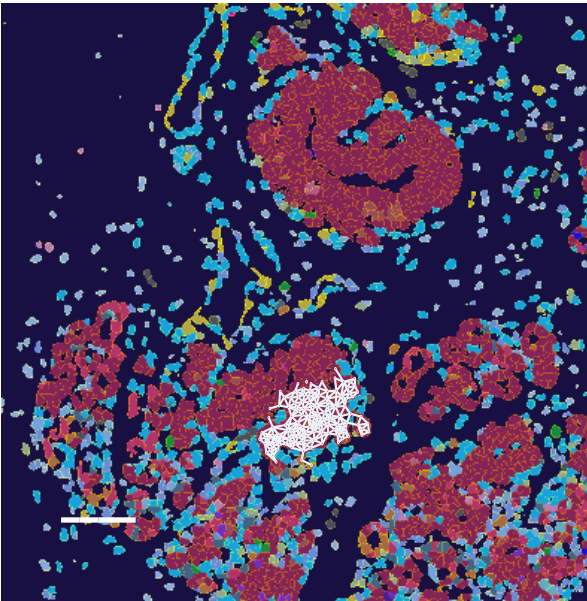

Type 12

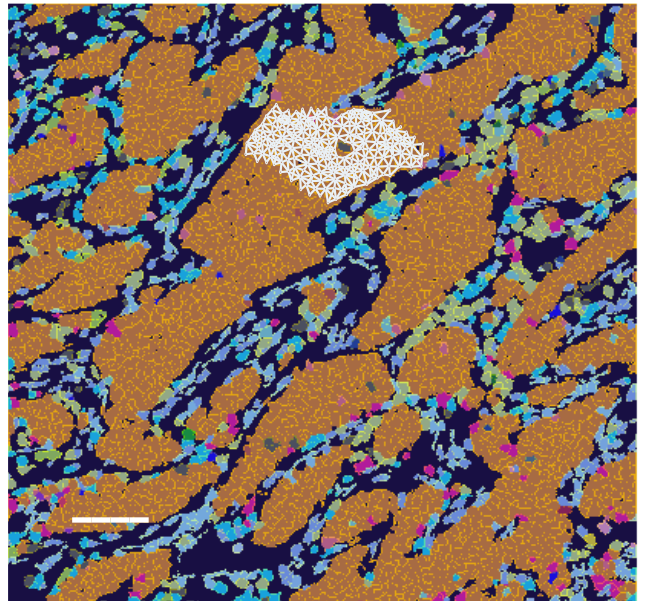

Type 13

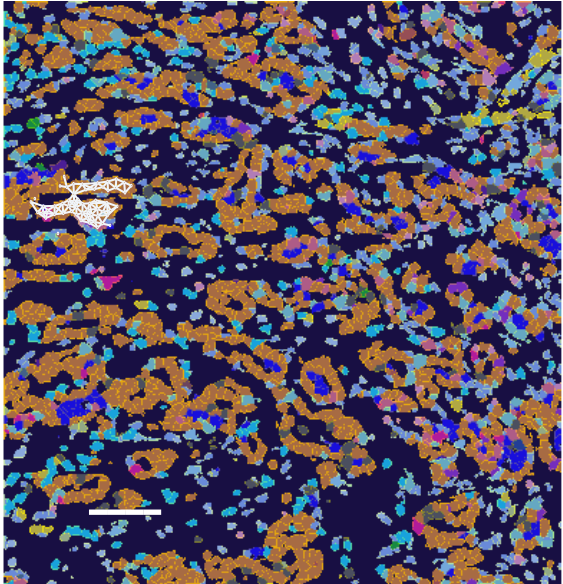

Type 14

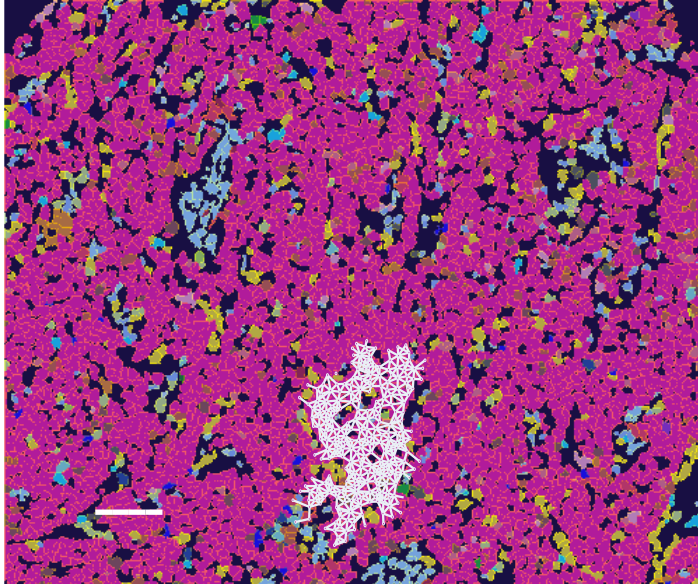

Type 15

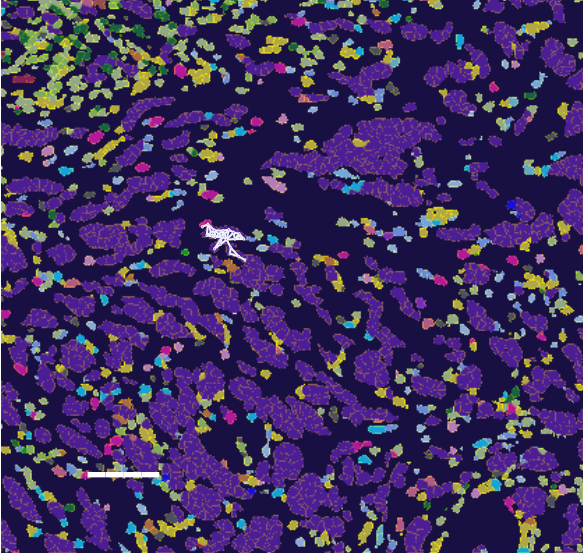

Type 16

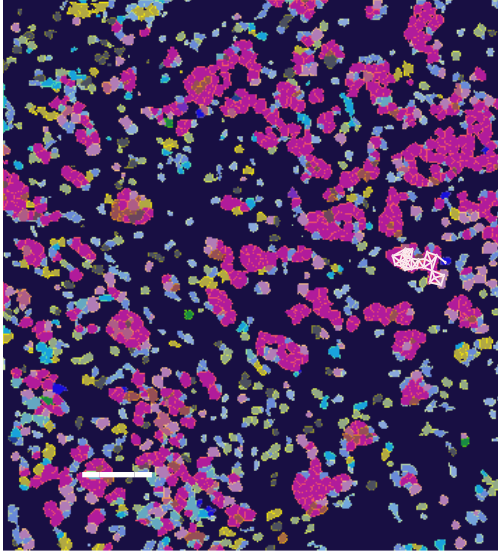

Type 17

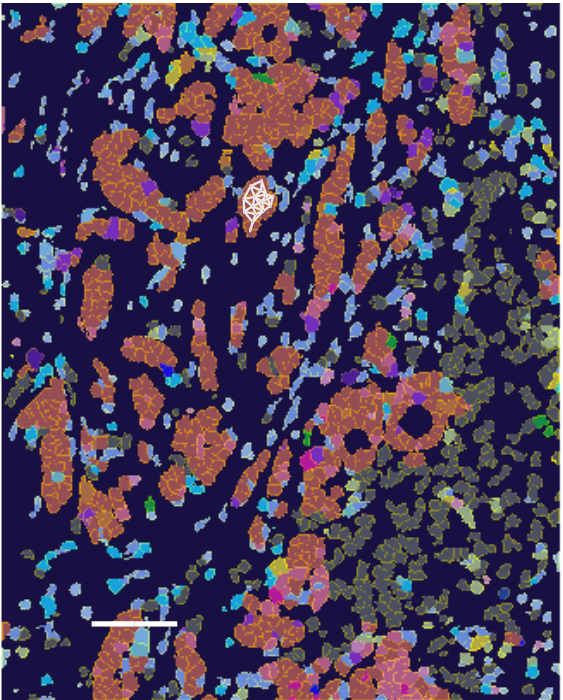

Type 18

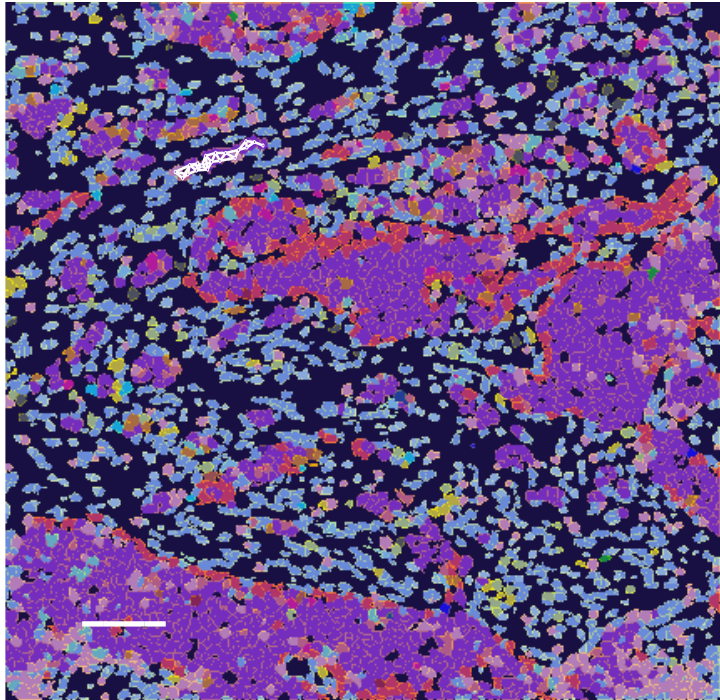

Type 19

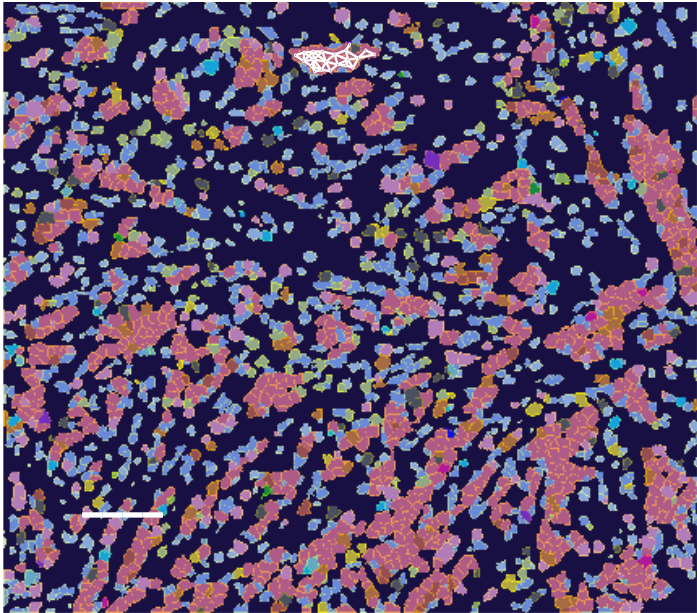

Type 20

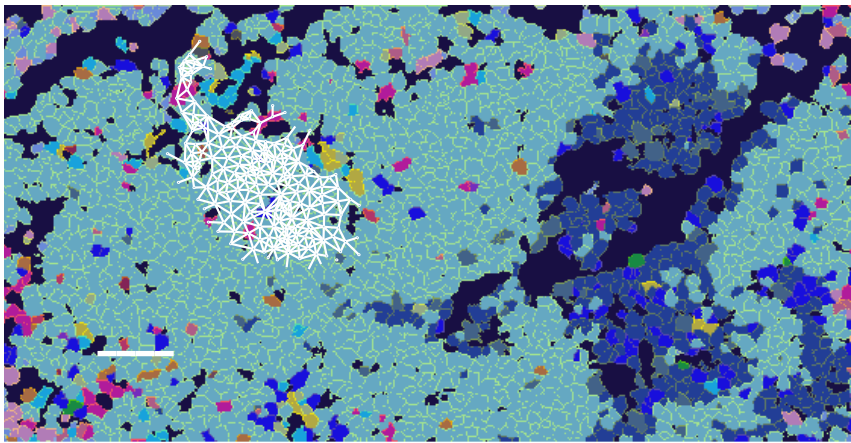

Type 21

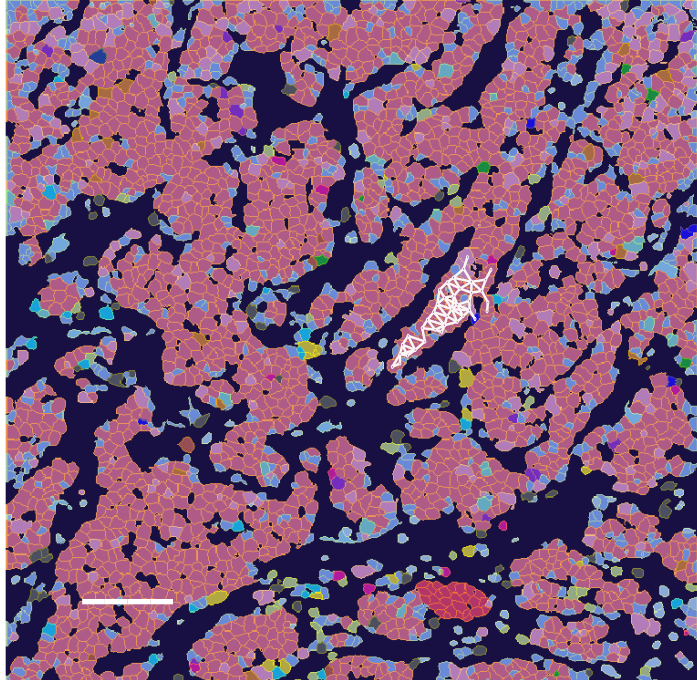

Type 22

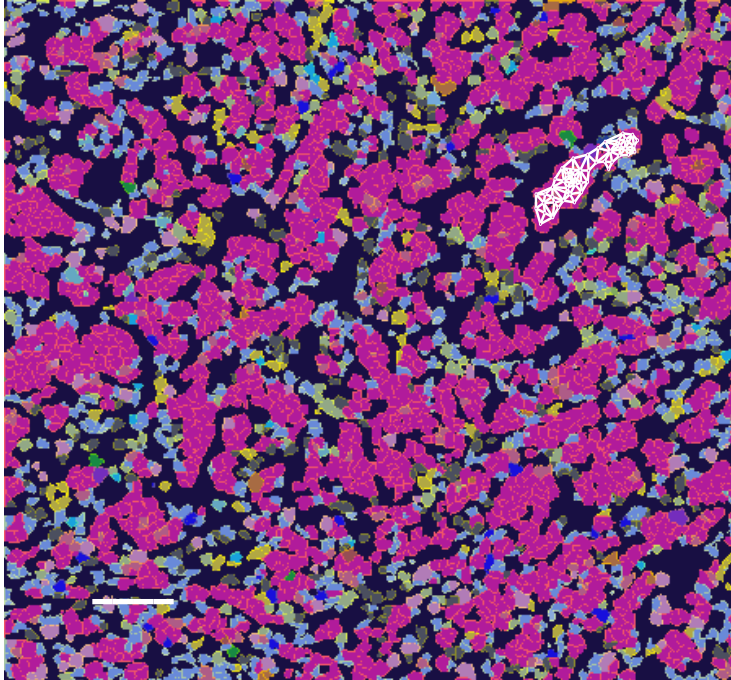

Type 23

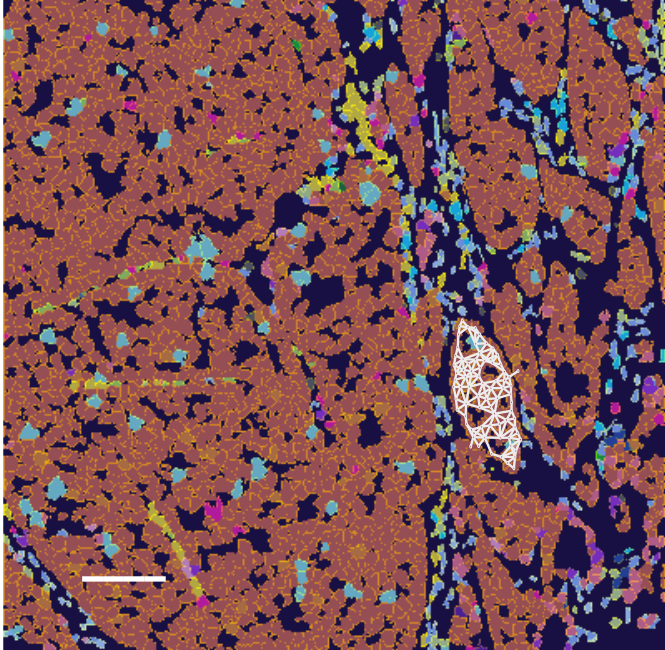



# Microenvironment Community Examples

Type 1

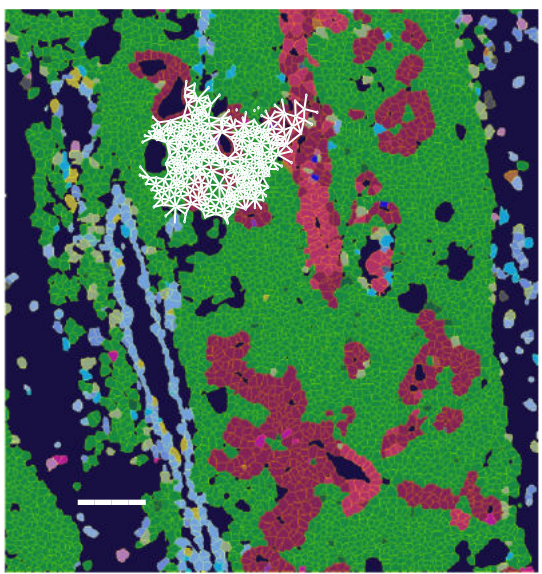

Type 2

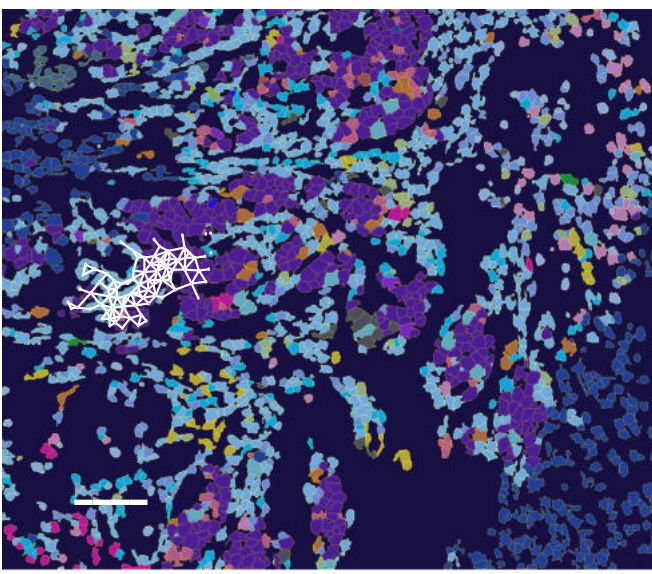

Type 3

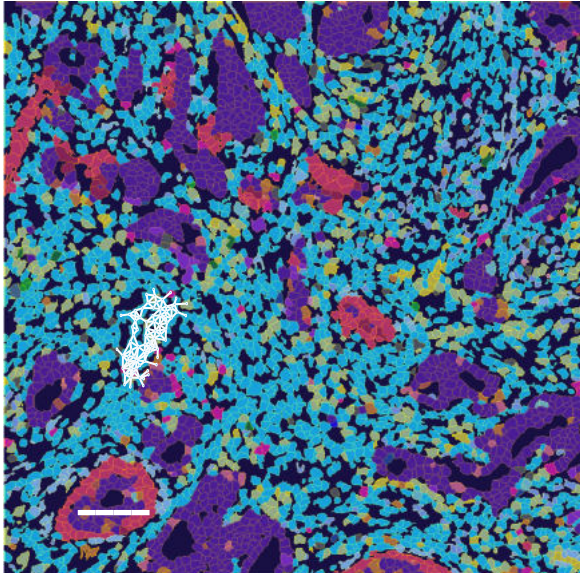

Type 4

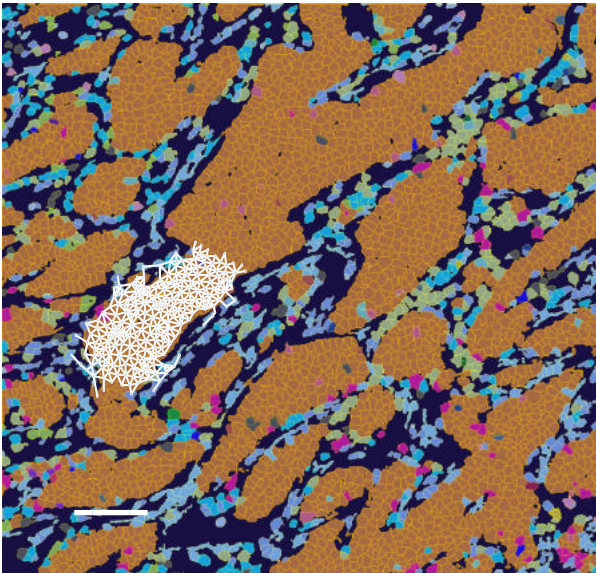

Type 5

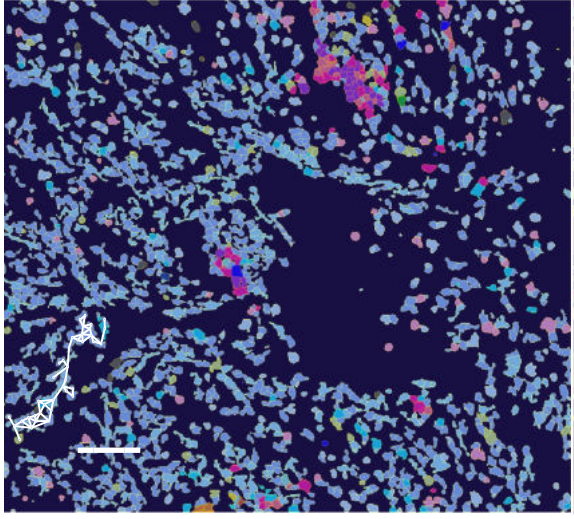

Type 6

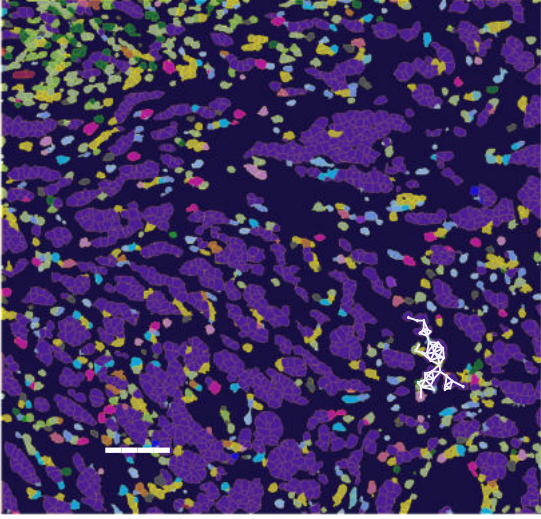

## Cellular Metacluster

- 1. B Cell
- 2. T & B Cells
- 3. T Cell
- 4. Macrophage
- 5. T Cell
- 6. Macrophage
- 7. Endothelial
- 8. Vimentin<sup>hi</sup>
- 9. Small Circular
- 10. Small Elongated
- 11. Fibronectin<sup>hi</sup>
- 12. Large Elongated
- 13. SMA<sup>hi</sup>Vimentin
- 14. Hypoxic
- 15. Apoptotic
- 16. Proliferative
- 17. p53<sup>+</sup>EGFR<sup>+</sup>
- 18. Basal CK
- 19. CK7<sup>+</sup>CK<sup>hi</sup>Cadherin
- 20. CK7<sup>+</sup>CK<sup>+</sup>
- 21. Epithelial<sup>low</sup>
- 22. CK<sup>low</sup>HR<sup>low</sup>
- 23. CK<sup>+</sup>HR<sup>hi</sup>
- 24. CK<sup>+</sup>HR<sup>+</sup>
- 25. CK<sup>+</sup>HR<sup>low</sup>
- 26. CK<sup>low</sup>HR<sup>hi</sup>p53<sup>+</sup>
- 27. Myoepithelial

Immune

Stromal

Epithelial

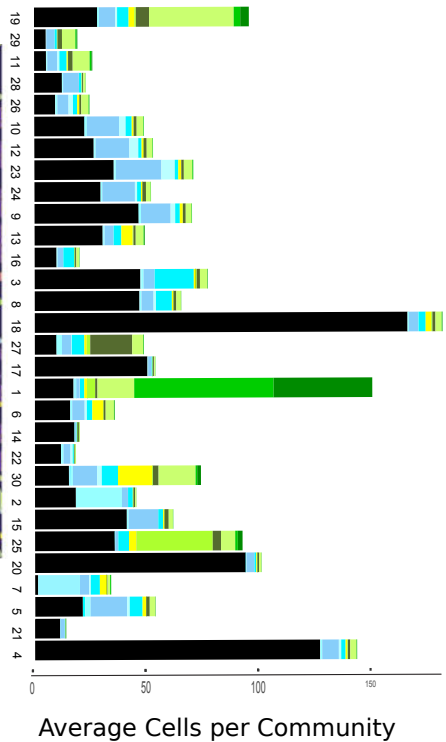

Average Cells per Community

Type 7

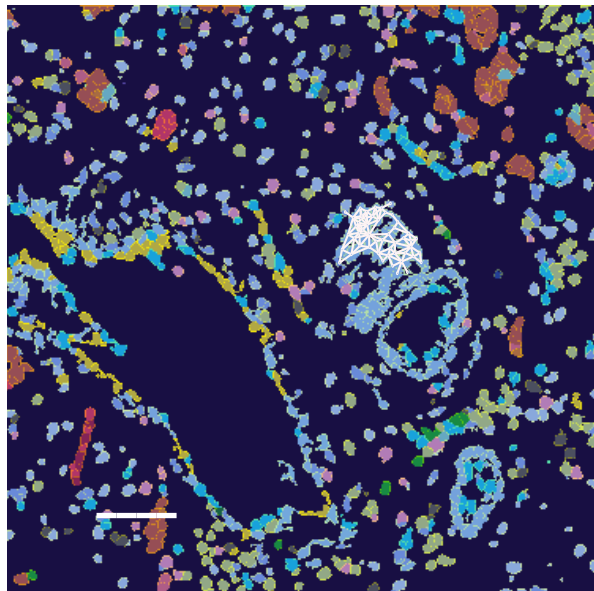

Type 8

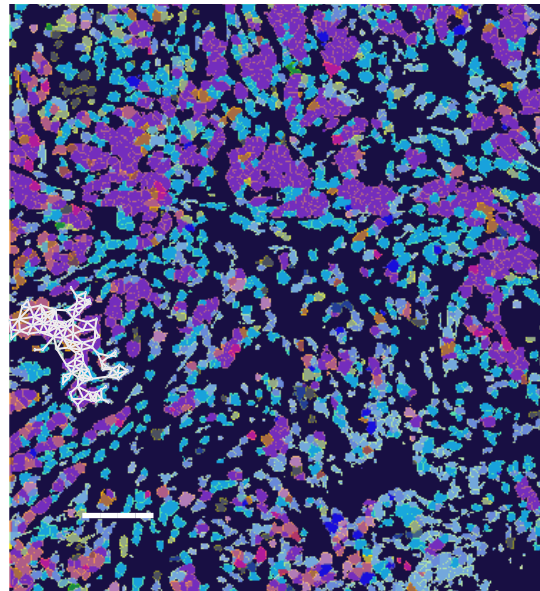

Type 9

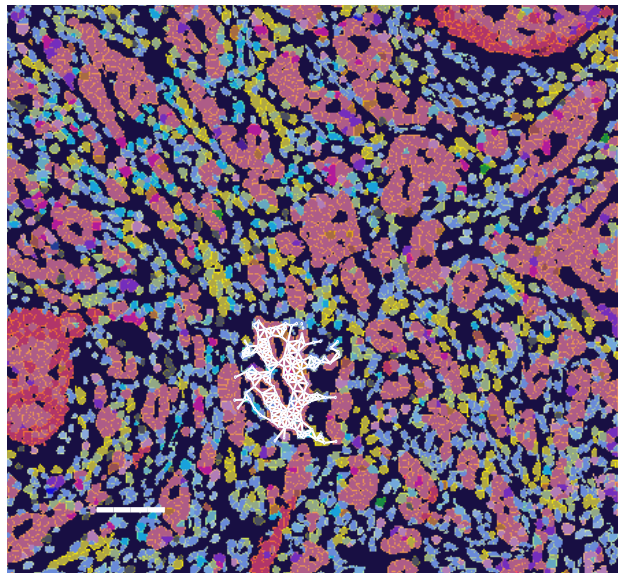

Type 10

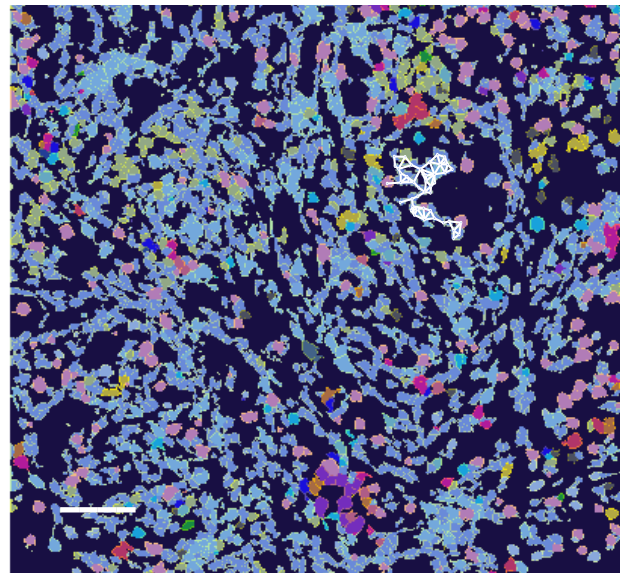

Type 11

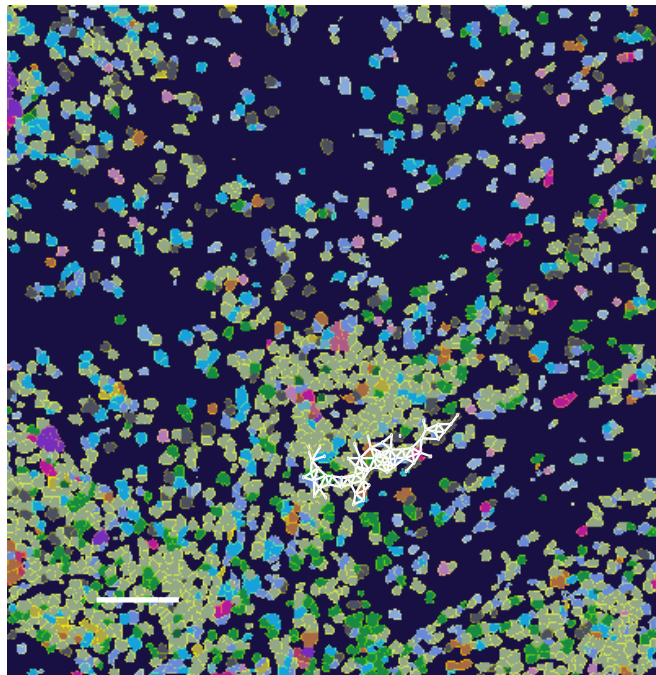

Type 12

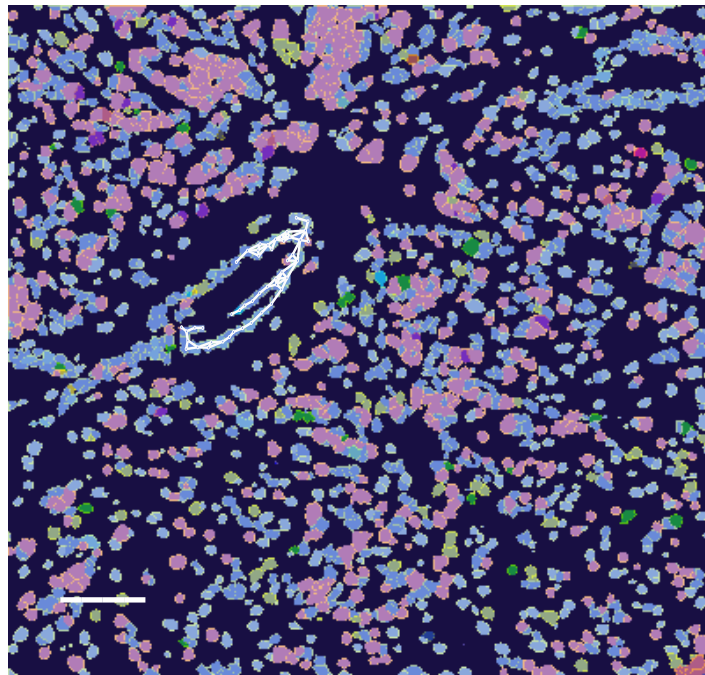

Type 13

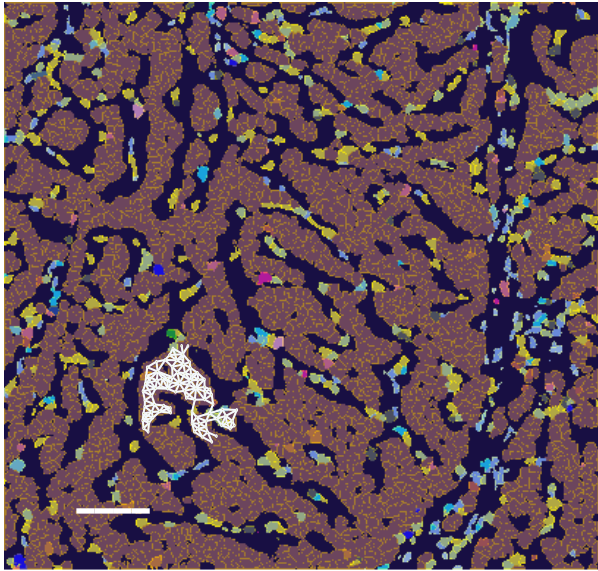

Type 14

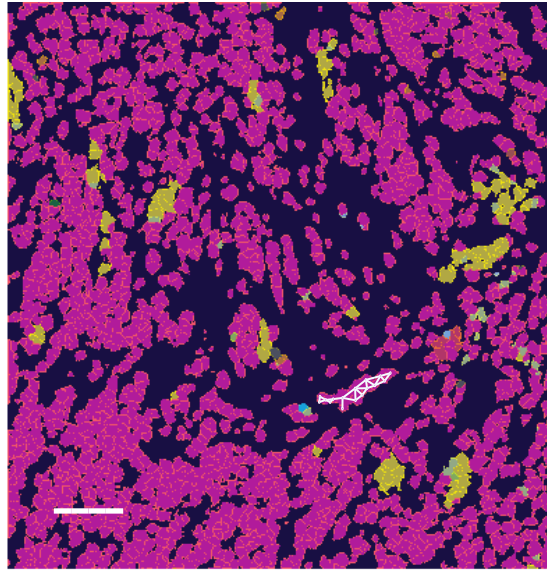

Type 15

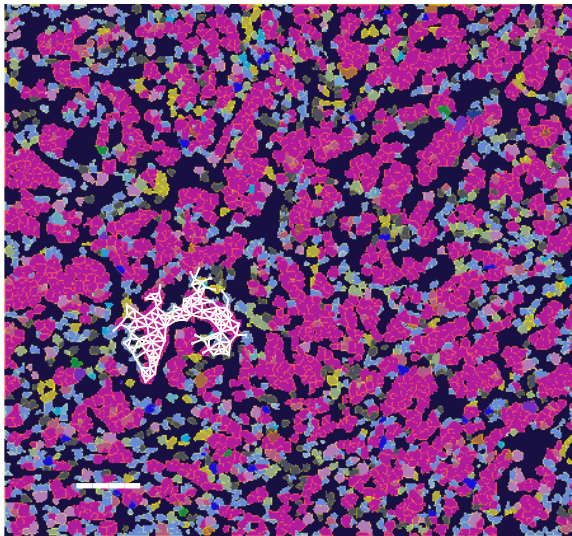

Type 16

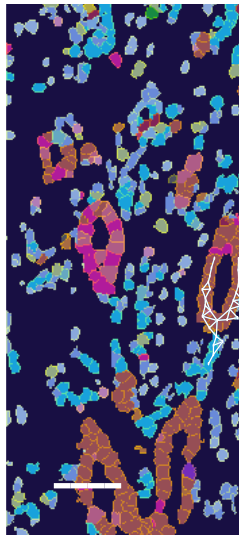

Type 17

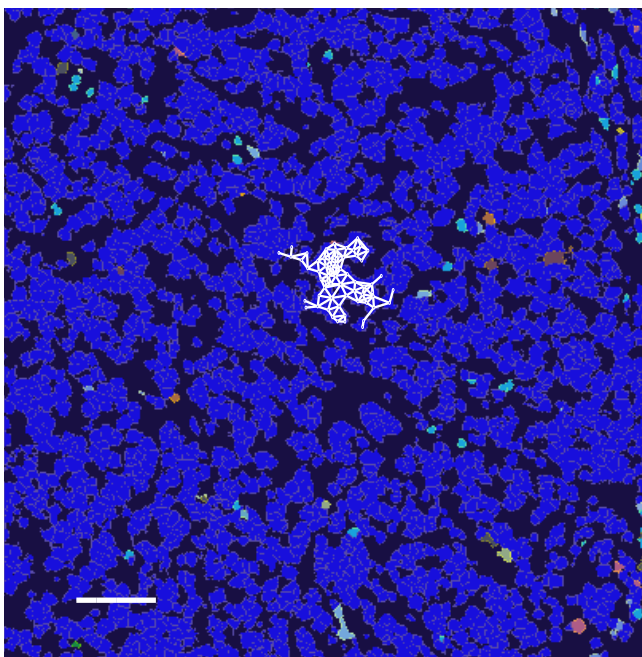

Type 18

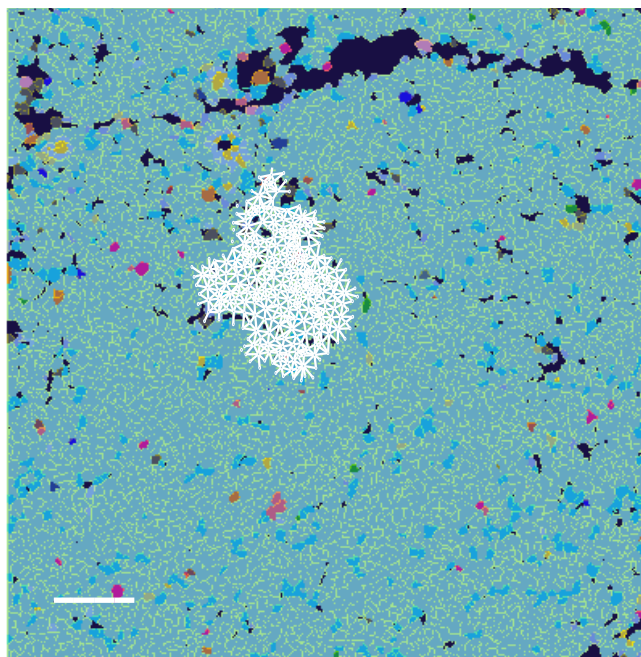

Type 19

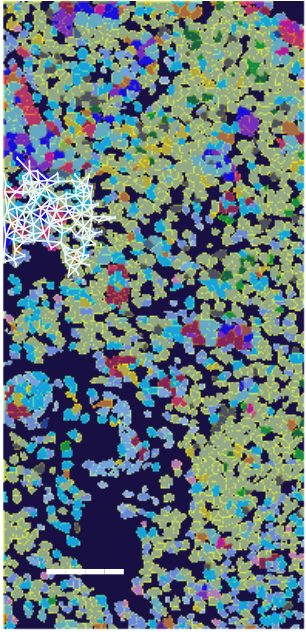

Type 20

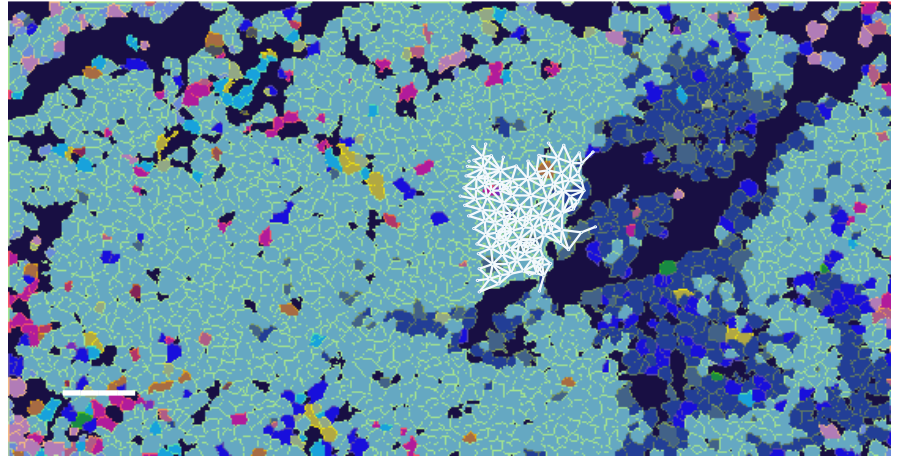

Type 21

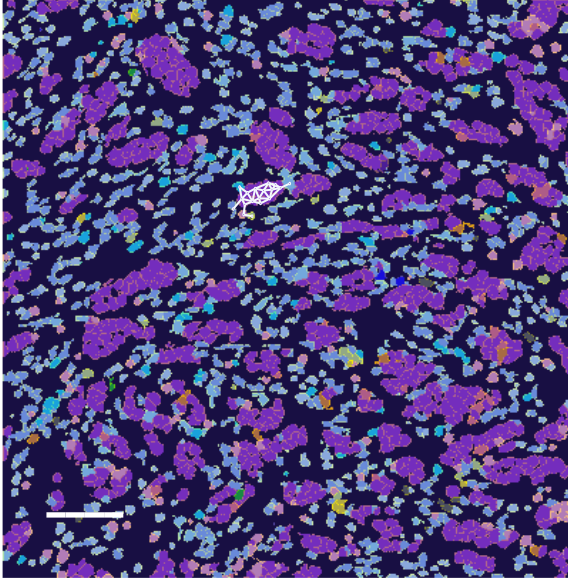

Type 22

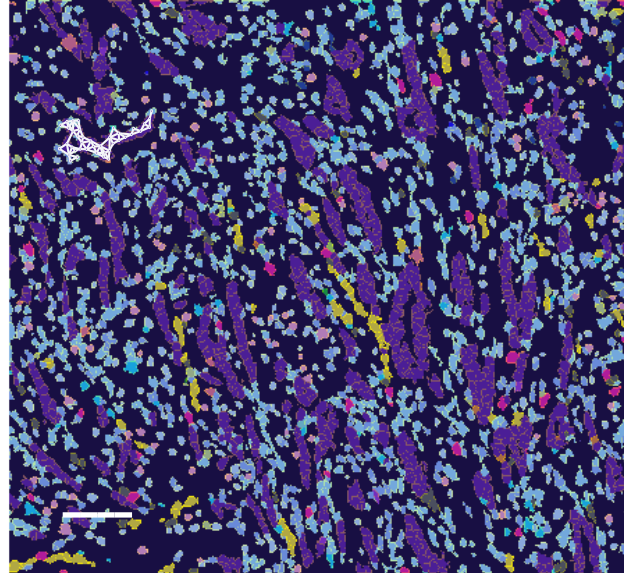

Type 23

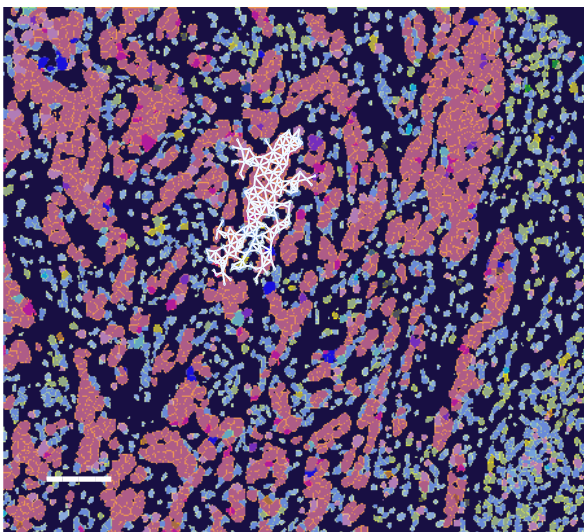

Type 24

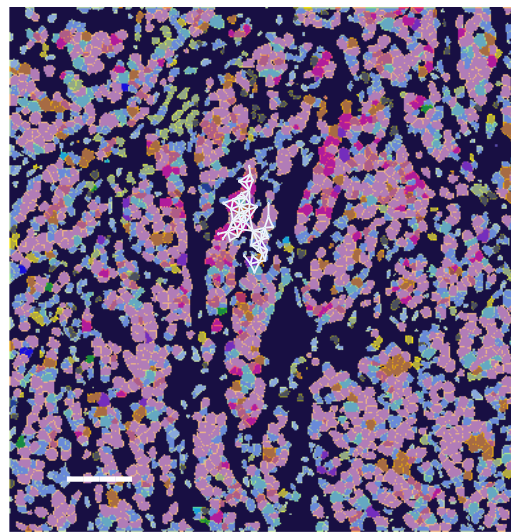

Type 25

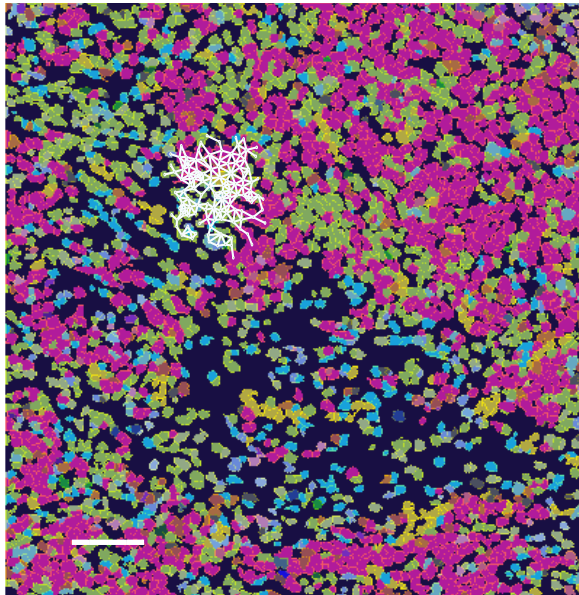

Type 26

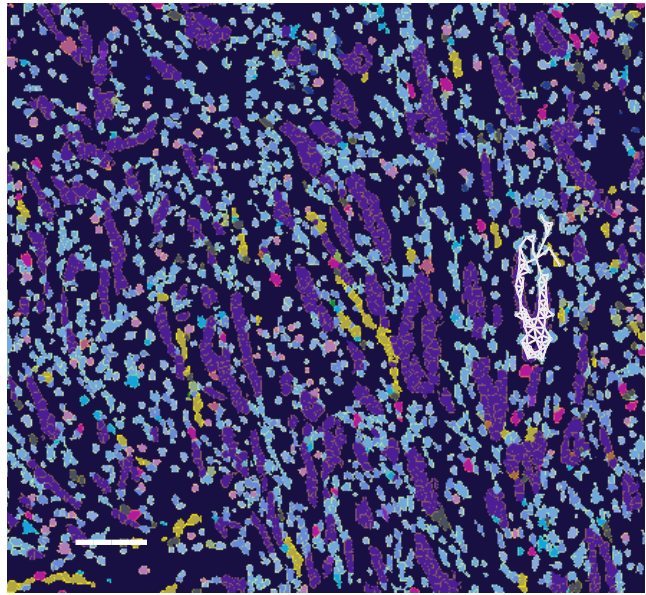

Type 27

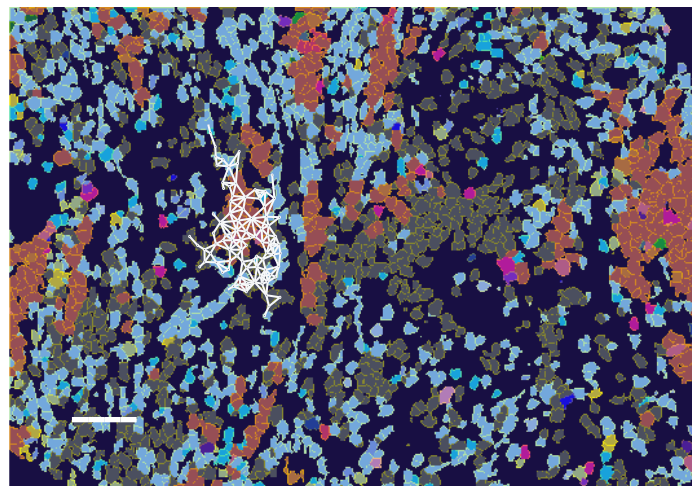

Type 28

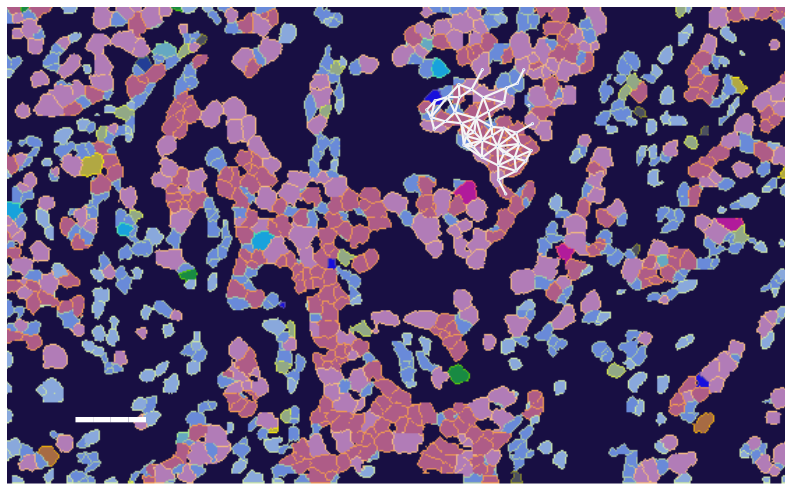

Type 29

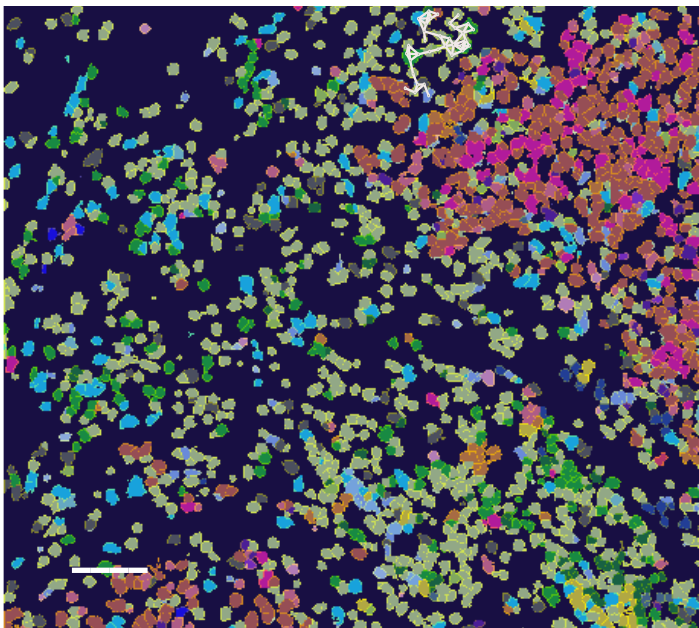

Type 30

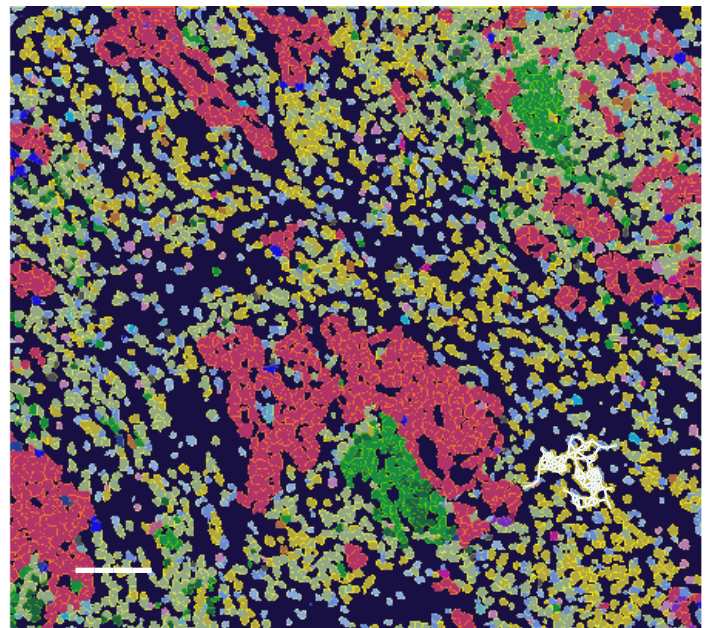

Supplementary Images 2: Example images from different patients of the analyzed cohort, each highlighting an individual epithelial or microenvironment community type. Scale bar = 100  $\mu$ m.

# Supplementary Images 3

**a**  
Single-Cell Patient  
Group 1:  
 $CK^{+}HR^{hi}$

panCK  
Fibronectin  
DNA  
ER  
E/P-Cadherin

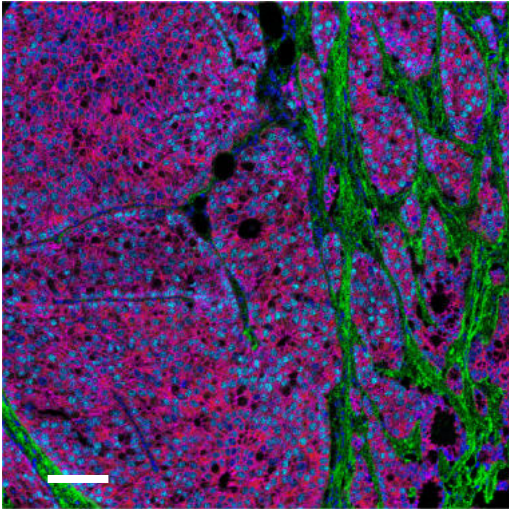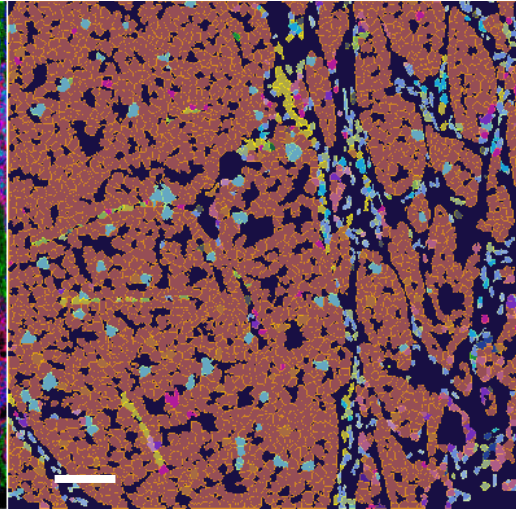

**b**  
Single-Cell Patient  
Group 2:  
 $CK^{+}HR^{+}$

panCK  
Fibronectin  
DNA  
PR  
E/P-Cadherin

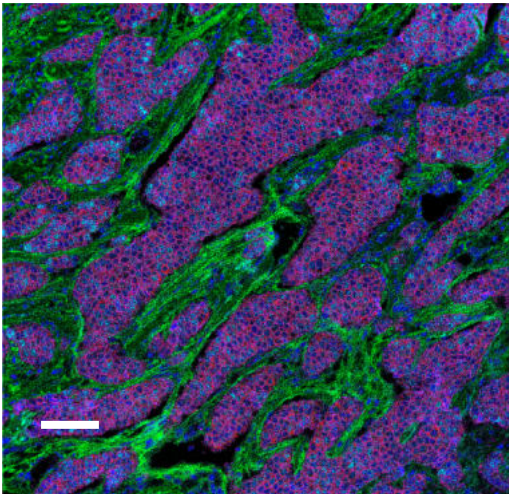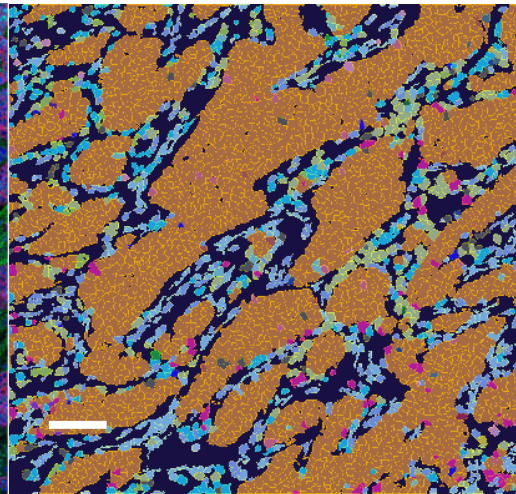

**c**  
Single-Cell Patient  
Group 3:  
 $CK^{+}HR^{hi}$   
&  $CK^{low}HR^{low}$

panCK  
Fibronectin  
DNA  
ER

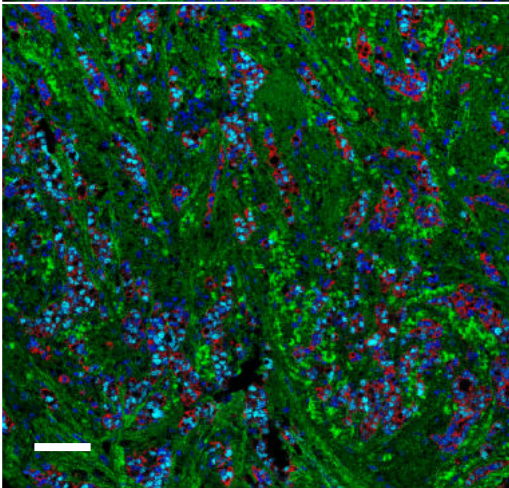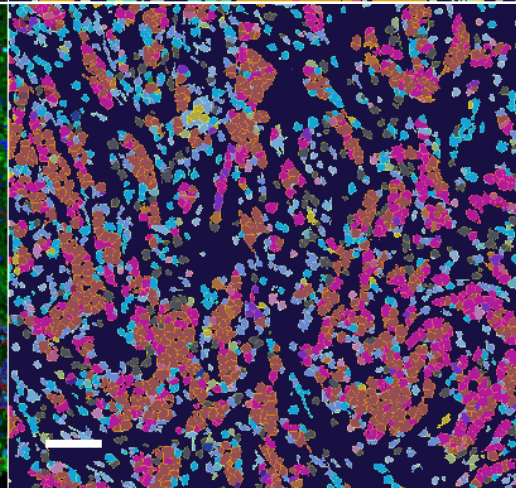

## Cellular Metacluster

- |            |                                                                                                                                                                                                                                                                                                                                                                                                                                                     |
|------------|-----------------------------------------------------------------------------------------------------------------------------------------------------------------------------------------------------------------------------------------------------------------------------------------------------------------------------------------------------------------------------------------------------------------------------------------------------|
| Immune     | <ul style="list-style-type: none"> <li>1. B Cell</li> <li>2. T &amp; B Cells</li> <li>3. T Cell</li> <li>4. Macrophage</li> <li>5. T Cell</li> <li>6. Macrophage</li> <li>7. Endothelial</li> <li>8. Vimentin<sup>hi</sup></li> <li>9. Small Circular</li> </ul>                                                                                                                                                                                    |
| Stromal    | <ul style="list-style-type: none"> <li>10. Small Elongated</li> <li>11. Fibronectin<sup>hi</sup></li> <li>12. Large Elongated</li> <li>13. SMA<sup>hi</sup>Vimentin</li> <li>14. Hypoxic</li> <li>15. Apoptotic</li> <li>16. Proliferative</li> <li>17. p53<sup>+</sup>EGFR<sup>+</sup></li> <li>18. Basal CK</li> </ul>                                                                                                                            |
| Epithelial | <ul style="list-style-type: none"> <li>19. CK7<sup>+</sup>CK<sup>hi</sup>Cadherin</li> <li>20. CK7<sup>+</sup>CK<sup>+</sup></li> <li>21. Epithelial<sup>low</sup></li> <li>22. CK<sup>low</sup>HR<sup>low</sup></li> <li>23. CK<sup>+</sup>HR<sup>hi</sup></li> <li>24. CK<sup>+</sup>HR<sup>+</sup></li> <li>25. CK<sup>+</sup>HR<sup>low</sup></li> <li>26. CK<sup>low</sup>HR<sup>hi</sup>p53<sup>+</sup></li> <li>27. Myoepithelial</li> </ul> |

**d**Single-Cell Patient  
Group 4: $CK^+HR^{low}$ 

panCK  
Fibronectin  
DNA  
PR  
E/P-Cadherin

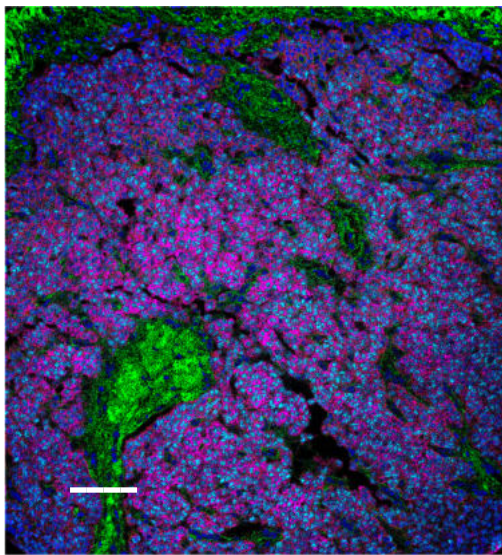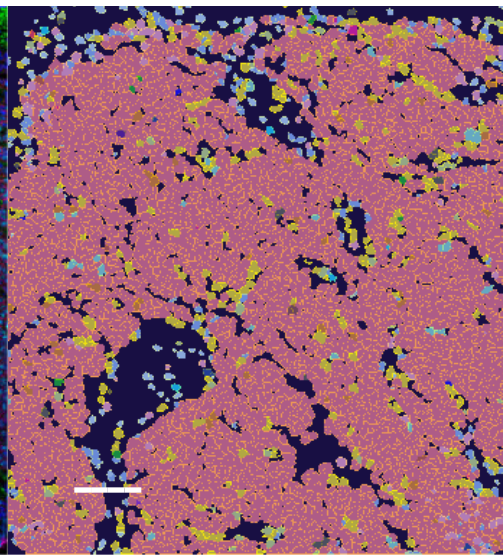

**Cellular Metacluster**

**Immune**

- 1. B Cell
- 2. T & B Cells
- 3. T Cell
- 4. Macrophage
- 5. T Cell
- 6. Macrophage
- 7. Endothelial
- 8. Vimentin<sup>hi</sup>

**Stromal**

- 9. Small Circular
- 10. Small Elongated
- 11. Fibronectin<sup>hi</sup>
- 12. Large Elongated
- 13. SMA<sup>hi</sup> Vimentin
- 14. Hypoxic
- 15. Apoptotic
- 16. Proliferative
- 17. p53<sup>+</sup>EGFR<sup>+</sup>

**Epithelial**

- 18. Basal CK
- 19. CK7<sup>+</sup>CK<sup>hi</sup>Cadherin
- 20. CK7<sup>+</sup>CK<sup>+</sup>
- 21. Epithelial<sup>low</sup>
- 22. CK<sup>low</sup>HR<sup>low</sup>
- 23. CK<sup>+</sup>HR<sup>hi</sup>
- 24. CK<sup>+</sup>HR<sup>+</sup>
- 25. CK<sup>+</sup>HR<sup>low</sup>
- 26. CK<sup>low</sup>HR<sup>hi</sup>p53<sup>+</sup>
- 27. Myoepithelial

**e**Single-Cell Patient  
Group 5: $CK^+HR^{low}$   
mixed

panCK  
Fibronectin  
DNA  
ER

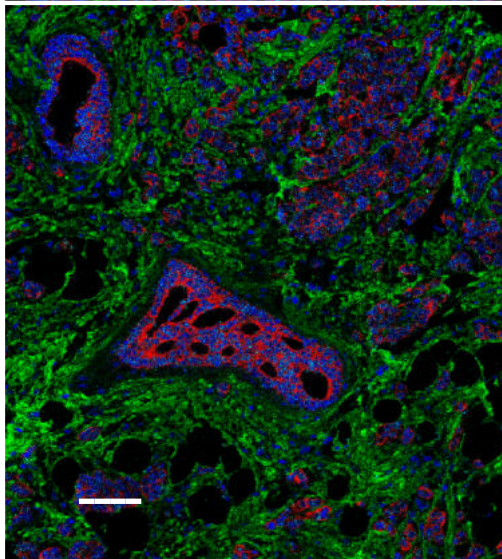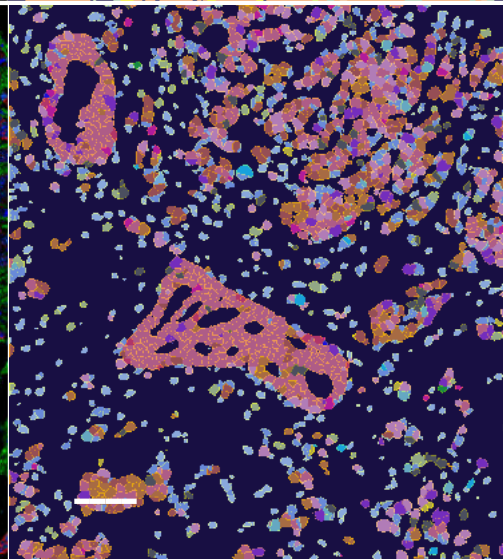**f**Single-Cell Patient  
Group 8:

Mixed

panCK  
Fibronectin  
DNA  
Ki67  
CK 14  
Vimentin

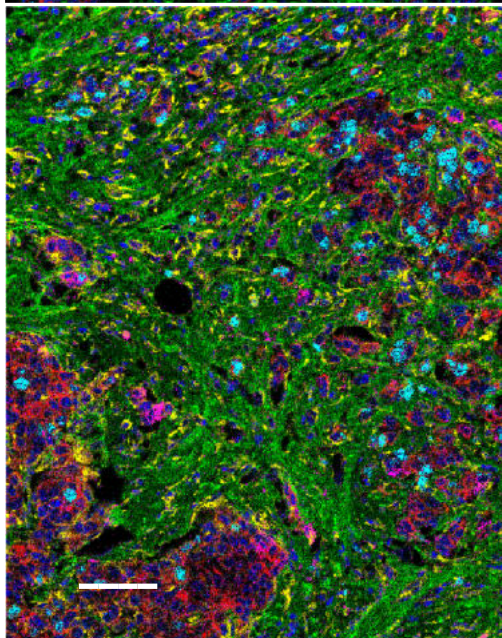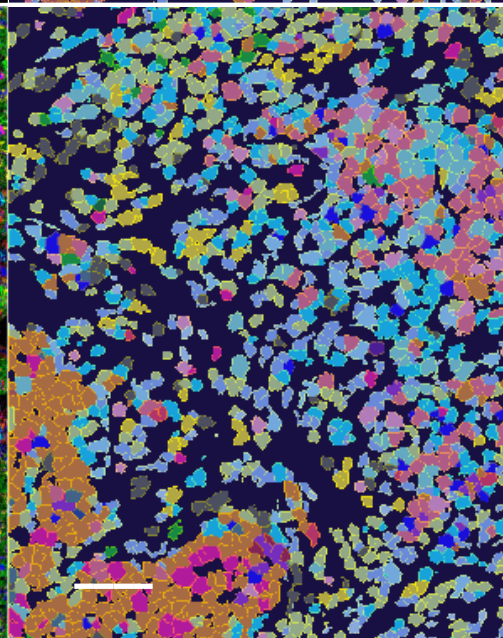

g

Single-Cell Patient  
Group 6:CK<sup>low</sup>HR<sup>low</sup> Large

panCK  
Fibronectin  
DNA  
ER  
E/P-Cadherin  
CD68

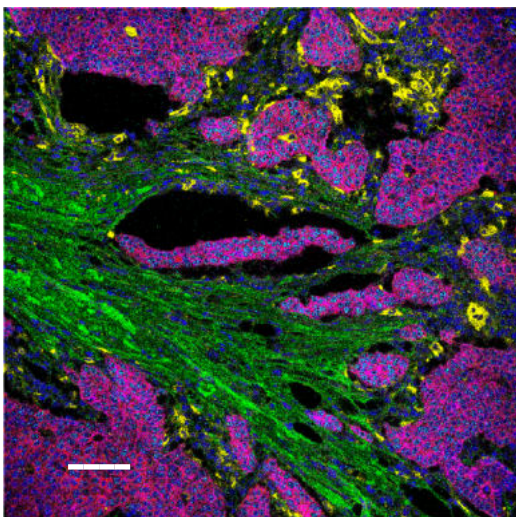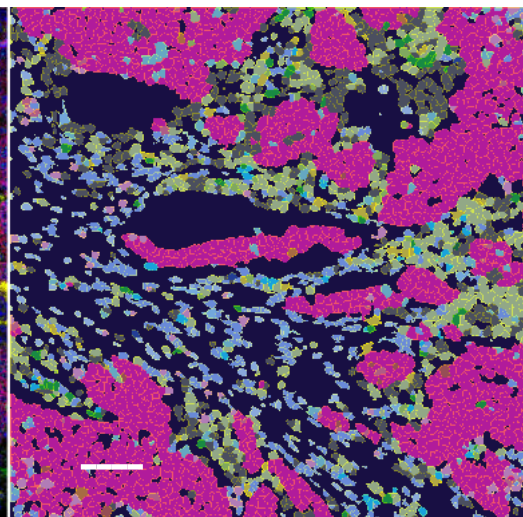

h

Single-Cell Patient  
Group 7:Epithelial<sup>low</sup>

panCK  
Fibronectin  
DNA  
E/P-Cadherin  
Vimentin

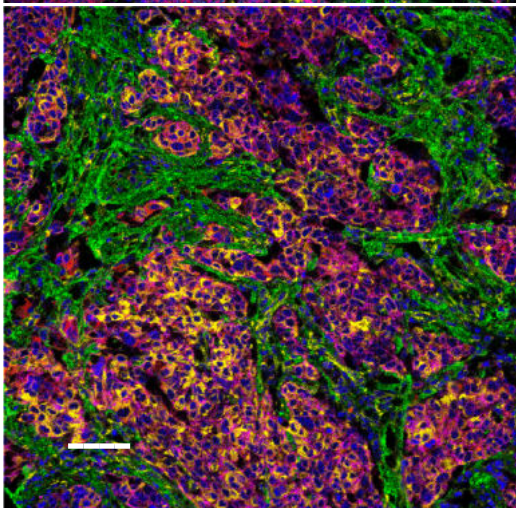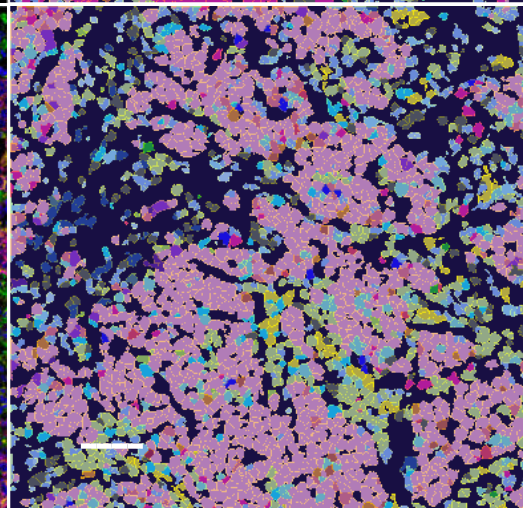

i

Single-Cell Patient  
Group 9:CK<sup>low</sup>HR<sup>low</sup>  
mixed

panCK  
Fibronectin  
DNA  
Ki67  
E/P-Cadherin  
CD45

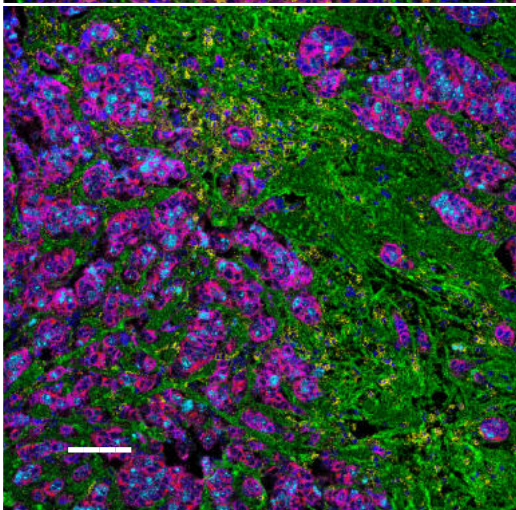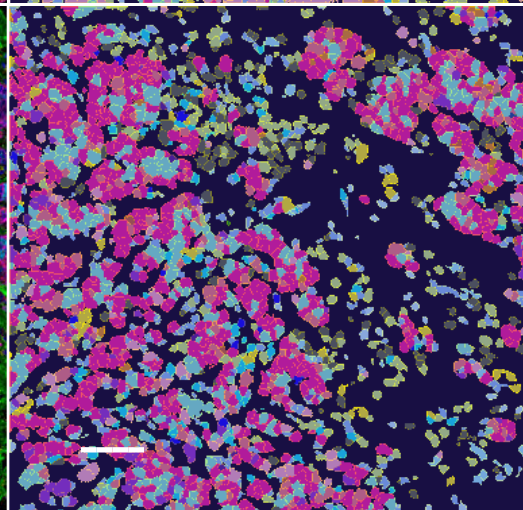

j

Single-Cell Patient  
Group 10:Epithelial<sup>low</sup>  
mixed

panCK  
Fibronectin  
DNA  
Ki67  
E/P-Cadherin  
Vimentin

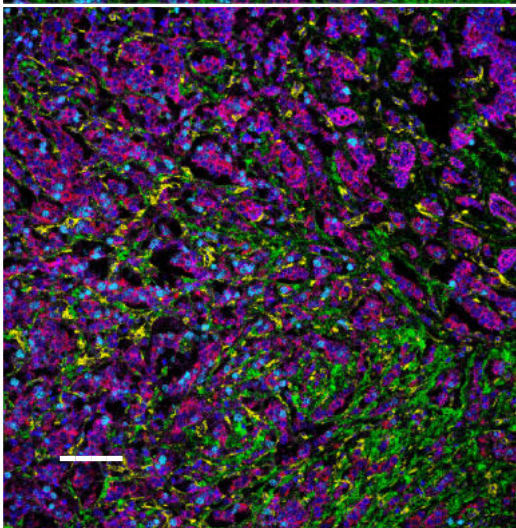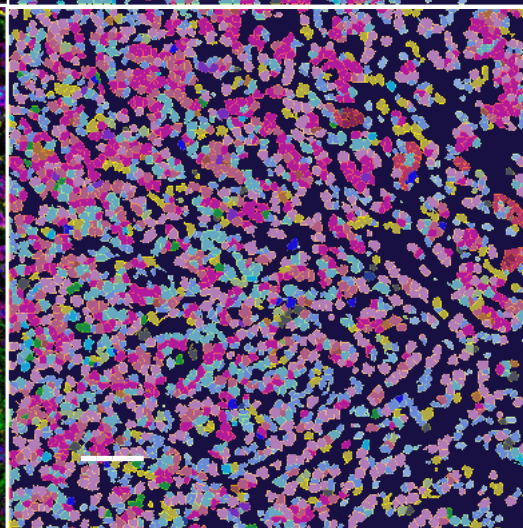

Cellular Metacluster

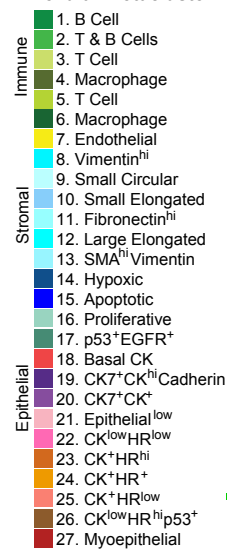



**k**

Single-Cell Patient  
Group 11:  
CK7<sup>+</sup>

panCK  
Fibronectin  
DNA  
CK7  
CD45  
Vimentin

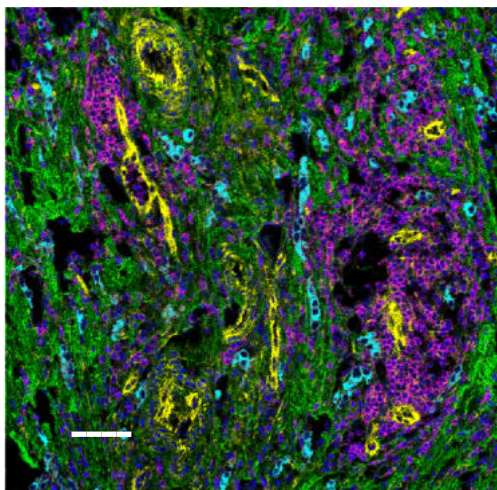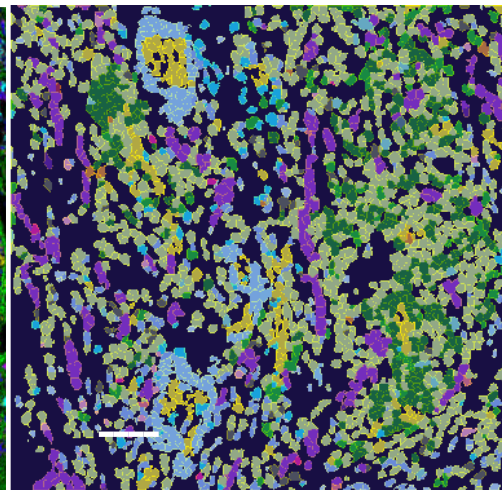

**Cellular Metacluster**

| Cluster | Cell Type                                           |
|---------|-----------------------------------------------------|
| 1       | B Cell                                              |
| 2       | T & B Cells                                         |
| 3       | T Cell                                              |
| 4       | Macrophage                                          |
| 5       | T Cell                                              |
| 6       | Macrophage                                          |
| 7       | Endothelial                                         |
| 8       | Vimentin <sup>hi</sup>                              |
| 9       | Small Circular                                      |
| 10      | Small Elongated                                     |
| 11      | Fibronectin <sup>hi</sup>                           |
| 12      | Large Elongated                                     |
| 13      | SMA <sup>hi</sup> Vimentin                          |
| 14      | Hypoxic                                             |
| 15      | Apoptotic                                           |
| 16      | Proliferative                                       |
| 17      | p53 <sup>+</sup> EGFR <sup>+</sup>                  |
| 18      | Basal CK                                            |
| 19      | CK7 <sup>+</sup> CK <sup>hi</sup> Cadherin          |
| 20      | CK7 <sup>+</sup> CK <sup>+</sup>                    |
| 21      | Epithelial <sup>low</sup>                           |
| 22      | CK <sup>low</sup> HR <sup>low</sup>                 |
| 23      | CK <sup>+</sup> HR <sup>hi</sup>                    |
| 24      | CK <sup>+</sup> HR <sup>+</sup>                     |
| 25      | CK <sup>+</sup> HR <sup>low</sup>                   |
| 26      | CK <sup>low</sup> HR <sup>hi</sup> p53 <sup>+</sup> |
| 27      | Myoepithelial                                       |

**Immune**

**Stromal**

**Epithelial**

**l**

Single-Cell Patient  
Group 12:  
CK7<sup>+</sup>CK<sup>hi</sup>  
Cadherin<sup>hi</sup>

E/P-Cadherin  
Fibronectin  
DNA  
CK7  
CD45  
Vimentin

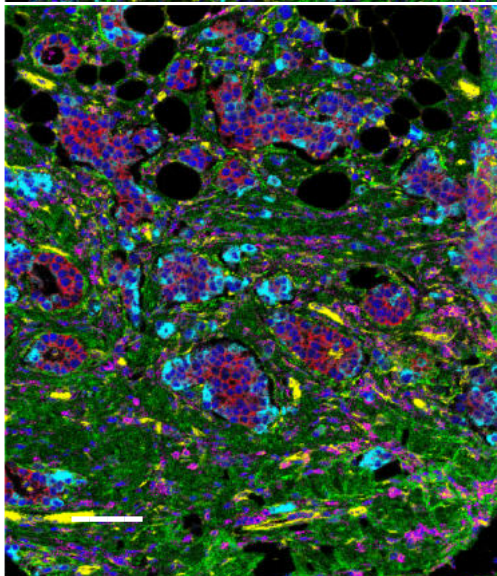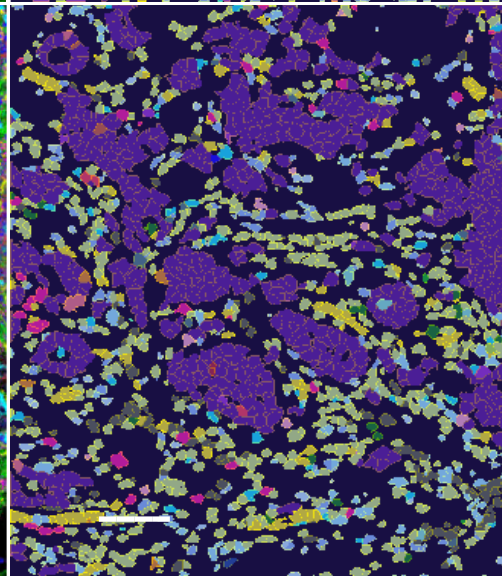**m**

Single-Cell Patient  
Group 13:  
Basal CK

panCK  
Fibronectin  
DNA  
CK14  
CK5  
CD68

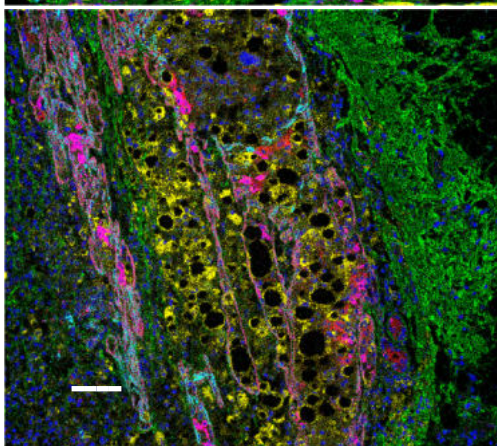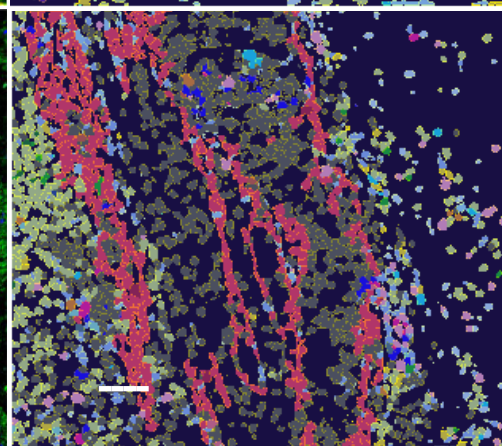**n**

Single-Cell Patient  
Group 18:  
CK<sup>-</sup>HR<sup>hi</sup>p53<sup>+</sup>

E/P-Cadherin  
Fibronectin  
DNA  
ER  
PR  
Vimentin

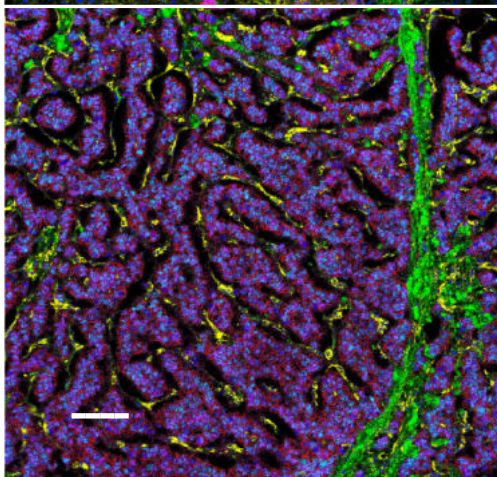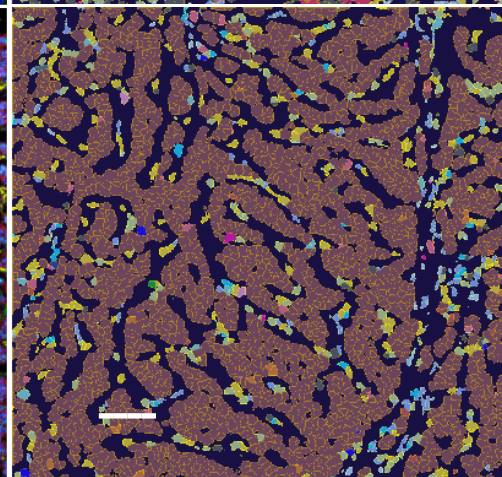

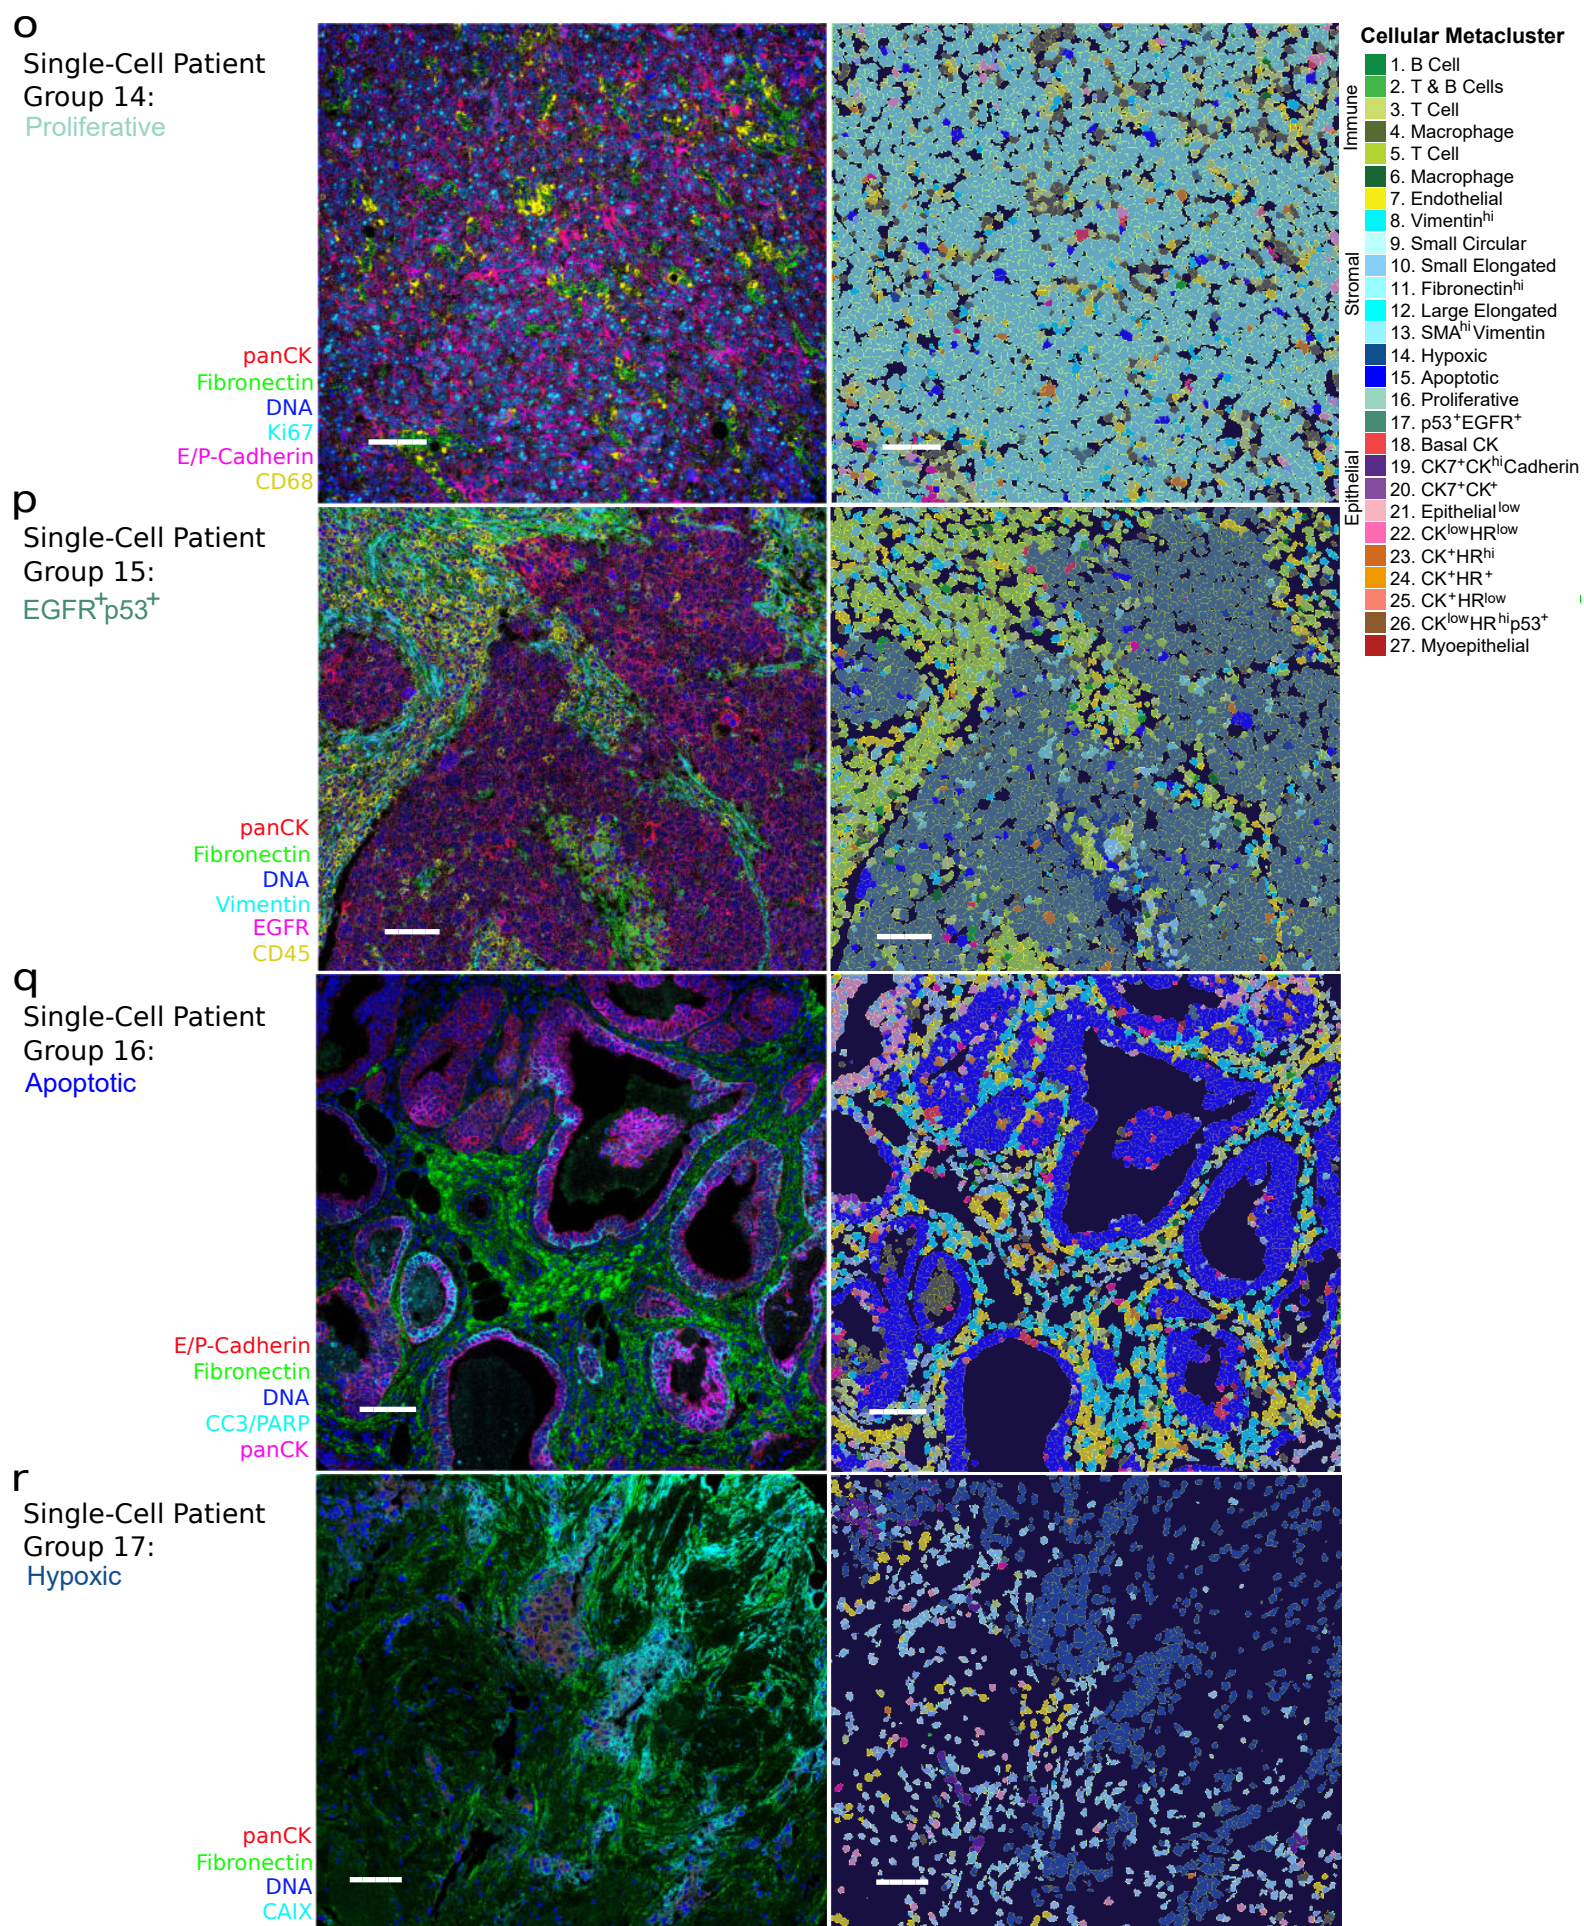

Supplementary Images 3: Example images representing a tumor from each SCP subgroup. (left) 6-color image of representative markers, (right) same image with single-cells colored by cell type metacluster. Scale bar = 100  $\mu$ m.

**Supplementary Table 1**

| Metadata                    | Values                  | Counts/ Means |
|-----------------------------|-------------------------|---------------|
| Grade                       | 1                       | 38            |
|                             | 2                       | 117           |
|                             | 3                       | 126           |
| Tumor Size [mm]             | 6 - 125                 | 26.28         |
| Age [years]                 | 26 - 92                 | 62.41         |
| Gender                      | Female                  | 281           |
|                             | Male                    | 0             |
| PTNM_M                      | 0                       | 274           |
|                             | 1                       | 7             |
| PTNM_T                      | 1                       | 11            |
|                             | 1b                      | 7             |
|                             | 1c                      | 99            |
|                             | 2                       | 132           |
|                             | 2a                      | 1             |
|                             | 3                       | 13            |
|                             | 4                       | 7             |
|                             | 4b                      | 11            |
| PTNM_N                      | 0                       | 135           |
|                             | 0s1                     | 2             |
|                             | 0sn                     | 1             |
|                             | 1                       | 32            |
|                             | 1mi                     | 9             |
|                             | 1a                      | 39            |
|                             | 2                       | 15            |
|                             | 2a                      | 15            |
|                             | 3                       | 7             |
|                             | 3a                      | 12            |
|                             | 3b                      | 1             |
|                             | ER Status               | Positive      |
| Negative                    |                         | 72            |
| PR Status                   | Positive                | 152           |
|                             | Negative                | 129           |
| HER2 Status                 | Positive                | 52            |
|                             | Negative                | 229           |
| Pre-surgery Treatment       | None                    | 279           |
|                             | Neoadjuvent Chemo       | 2             |
| DFS [months] follow up      | 0 - 195                 | 69.85         |
| OS [months] follow up       | 0 - 236                 | 80.38         |
| Patient Status              | Alive                   | 182           |
|                             | Alive with Metastases   | 20            |
|                             | Death by Pimary Disease | 57            |
|                             | Death                   | 22            |
| Response to Hormone Therapy | NA                      | 116           |
|                             | Sensitive               | 88            |
|                             | Refractory              | 44            |
|                             | Resistant               | 33            |
| Clinical Subtype            | HR+HER2+                | 29            |
|                             | HR+HER2-                | 175           |
|                             | HR-HER2+                | 23            |
|                             | TripleNeg               | 48            |

**Supplementary Table 2**

| <b>Metal Tag</b> | <b>Target</b>             | <b>Antibody Clone</b>   | <b>Company</b>             | <b>Catalogue Number</b> | <b>Lot</b>  |
|------------------|---------------------------|-------------------------|----------------------------|-------------------------|-------------|
| In113            | Histone H3                | D1H2                    | Cell Signaling             | 4499BF                  | 12          |
| La139            | H3 (Lys28) trimethylate   | C36B11                  | Cell Signaling             | 9733BF                  | 11          |
| Pr141            | Cytokeratin 5             | EP1601Y                 | Abcam                      | Custom                  | GR299320-I  |
| Nd142            | Fibronectin               | 10/Fibronectin          | BD Biosciences             | 610078                  | 6251888     |
| Nd143            | Cytokeratin 19            | Troma-III               | Dev Studies Hybridoma Bank | Troma -III              | 2003-07-13  |
| Nd144            | Cytokeratin 8/18          | C51                     | Cell Signaling             | 4546BF                  | 2           |
| Nd145            | Twist                     | polyclonal_Twist1_ABD29 | Millipore                  | ABD29                   | 2754704     |
| Nd146            | CD68                      | KP1                     | E-Bioscience               | 14-0688-82              | E15987-105  |
| Sm147            | Keratin 14 (KRT14)        | polyclonal_PA5-16722    | Thermo Fischer             | PA5-16722               | SE2391461H  |
| Nd148            | SMA                       | 1A4                     | Abcam                      | ab7817                  | 033M4768    |
| Sm149            | Vimentin                  | D21H3                   | Cell Signaling             | 5741BF                  | 3           |
| Nd150            | c-Myc                     | 90000000000             | Biologend                  | 626802                  | B201394     |
| Eu151            | c-erbB-2 - Her2           | 3B5                     | BD Biosciences             | 554299                  | 6182799     |
| Sm152            | CD3 epsilon               | D7A6E                   | Cell Signaling             | 85061                   | 2           |
| Eu153            | Histone H3                | HTA28                   | Biologend                  | 641002                  | B200946     |
| Gd155            | Slug                      | 666633                  | R&D Systems                | Custom                  | CFZB021603A |
| Gd156            | Estrogen Receptor Alpha   | EP1                     | Epitomics                  | AC-0015EU               |             |
| Gd156            | Rabbit IgG (H+L)          | polyclonal_AI-1000      | Vector Labs                | AI-1000                 | ZA0911      |
| Gd158            | Progesterone Receptor A/B | SP2                     | Spring Bioscience          | M3024 C                 | 131017      |
| Gd158            | Progesterone Receptor A/B | EP2                     | Epitomics                  | AC-0028EU               |             |
| Tb159            | p53                       | 7F5                     | Cell Signaling             | 2527BF                  | 5           |
| Gd160            | CD44                      | polyclonal_CD44         | R&D Systems                | AF3660                  | CFOE0216011 |
| Dy162            | CD45                      | 2B11                    | E-Bioscience               | 14-9457-82              | 4298126     |
| Dy163            | GATA3                     | L50-823                 | BD Biosciences             | 558686                  | 6132744     |
| Dy164            | CD20                      | L26                     | E-Bioscience               | 14-0202-82              | 4285442     |
| Er166            | Carbonic Anhydrase IX     | polyclonal_CAIX         | R&D Systems                | AF2188                  | VNQ0215032  |
| Er167            | E-Cadherin / P-Cadherin   | 36/E-Cadherin           | BD Biosciences             | 610182                  | 6251878     |
| Er168            | Ki-67                     | 8D5                     | Cell Signaling             | 9449BF                  | 2           |
| Tm169            | EGFR                      | D38B1                   | Cell Signaling             | 4267BF                  | 13          |
| Yb170            | p-S6                      | D57.2.2E                | Cell Signaling             | 4858BF                  | 15          |

|       |                  |          |                   |           |         |
|-------|------------------|----------|-------------------|-----------|---------|
| Yb172 | vWF              | poly vwf | Millipore         | AB7356    | 2700933 |
| Yb172 | CD31             | JC70A    | Novus Biologicals | NB600-562 | B-1     |
| Yb173 | p-mTOR           | 49F9     | Cell Signaling    | 2976      | 11      |
| Yb174 | Cytokeratin 7    | RCK105   | BD Biosciences    | 550507    | 6083676 |
| Lu175 | pan Cytokeratin  | AE1      | Millipore         | MAB1612   | 2341224 |
| Lu175 | pan Cytokeratin  | AE3      | Millipore         | MAB1611   | 2607604 |
| Yb176 | cleaved PARP     | F21-852  | BD Biosciences    | 552596    | 2150663 |
| Yb176 | Cleaved Caspase3 | C92-605  | BD Biosciences    | 559565    | 6074683 |

**Supplementary Table 3**

| Single-Cell Pathology<br>Patient Group                                          | Nr. Patients | Tumor Size [mm] |      | Age [y]<br>Mean | Grade<br>1 | Grade<br>2 | Grade<br>3 | PTNM_M<br>0 | PTNM_M<br>1 |
|---------------------------------------------------------------------------------|--------------|-----------------|------|-----------------|------------|------------|------------|-------------|-------------|
|                                                                                 |              | Mean            | STD  |                 |            |            |            |             |             |
| <b>1</b> CK <sup>+</sup> Hr <sup>hi</sup>                                       | 17           | 23.0            | 11.4 | 67.5            | 5          | 9          | 3          | 16          | 1           |
| <b>2</b> CK <sup>+</sup> HR <sup>+</sup>                                        | 21           | 22.3            | 10.3 | 60.4            | 4          | 13         | 4          | 21          |             |
| <b>3</b> CK <sup>+</sup> HR <sup>hi</sup> & CK <sup>low</sup> HR <sup>low</sup> | 20           | 21.4            | 7.3  | 64.4            | 4          | 9          | 7          | 19          | 1           |
| <b>4</b> CK <sup>+</sup> HR <sup>low</sup>                                      | 12           | 26.5            | 20.0 | 66.8            |            | 9          | 3          | 11          | 1           |
| <b>5</b> CK <sup>+</sup> HR <sup>low</sup> mixed                                | 32           | 23.8            | 11.6 | 60.7            | 10         | 13         | 9          | 32          |             |
| <b>6</b> CK <sup>low</sup> HR <sup>low</sup> Large                              | 10           | 27.7            | 8.4  | 65.3            |            | 4          | 6          | 10          |             |
| <b>7</b> Epithelial <sup>low</sup>                                              | 13           | 25.0            | 9.9  | 63.8            | 1          | 6          | 6          | 13          |             |
| <b>8</b> Mixed                                                                  | 11           | 21.0            | 11.0 | 60.8            |            | 5          | 6          | 11          |             |
| <b>9</b> CK <sup>low</sup> HR <sup>low</sup> mixed                              | 20           | 30.0            | 20.4 | 62.0            | 1          | 8          | 11         | 19          | 1           |
| <b>10</b> Epithelial <sup>low</sup> mixed                                       | 24           | 26.6            | 12.2 | 60.2            | 3          | 12         | 9          | 22          | 2           |
| <b>11</b> CK7 <sup>+</sup>                                                      | 31           | 29.4            | 16.5 | 63.9            | 6          | 15         | 10         | 31          |             |
| <b>12</b> CK7 <sup>+</sup> CK <sup>hi</sup> E/P-Cadherin <sup>hi</sup>          | 14           | 26.5            | 21.2 | 60.4            | 3          | 6          | 5          | 13          | 1           |
| <b>13</b> Basal CK                                                              | 15           | 32.2            | 25.9 | 60.7            |            | 4          | 11         | 15          |             |
| <b>14</b> Proliferative                                                         | 11           | 35.2            | 30.9 | 59.3            |            | 1          | 10         | 11          |             |
| <b>15</b> EGFR <sup>+</sup> p53 <sup>+</sup>                                    | 8            | 22.6            | 6.6  | 64.0            |            |            | 8          | 8           |             |
| <b>16</b> Apoptotic                                                             | 10           | 28.2            | 10.6 | 58.9            | 1          | 2          | 7          | 10          |             |
| <b>17</b> Hypoxic                                                               | 9            | 26.6            | 12.1 | 61.2            |            |            | 9          | 9           |             |
| <b>18</b> CK <sup>-</sup> HR <sup>hi</sup> p53 <sup>+</sup>                     | 3            | 40.3            | 18.5 | 71.3            |            | 1          | 2          | 3           |             |

| <b>Single-Cell Pathology</b>                                                    | PTNM_N | PTNM_N | PTNM_N | PTNM_N | PTNM_N | PTNM_N | PTNM_N | PTNM_N | PTNM_N | PTNM_N |
|---------------------------------------------------------------------------------|--------|--------|--------|--------|--------|--------|--------|--------|--------|--------|
| <b>Patient Group</b>                                                            | 0      | Osl    | Osn    | 1      | 1a     | 1mi    | 2      | 2a     | 3      | 3a     |
| <b>1</b> CK <sup>+</sup> Hr <sup>hi</sup>                                       | 7      |        |        | 4      | 3      |        |        |        | 1      |        |
| <b>2</b> CK <sup>+</sup> HR <sup>+</sup>                                        | 12     |        |        | 3      |        | 1      | 1      | 2      |        |        |
| <b>3</b> CK <sup>+</sup> HR <sup>hi</sup> & CK <sup>low</sup> HR <sup>low</sup> | 7      |        |        | 3      | 5      |        | 1      | 1      | 2      | 1      |
| <b>4</b> CK <sup>+</sup> HR <sup>low</sup>                                      | 6      |        |        | 3      | 2      |        |        |        |        |        |
| <b>5</b> CK <sup>+</sup> HR <sup>low</sup> mixed                                | 17     | 1      |        | 2      | 4      | 1      | 2      | 2      |        | 1      |
| <b>6</b> CK <sup>low</sup> HR <sup>low</sup> Large                              | 2      |        |        | 1      | 1      | 1      | 2      |        | 1      | 1      |
| <b>7</b> Epithelial <sup>low</sup>                                              | 7      |        | 1      | 1      |        | 2      | 1      |        |        |        |
| <b>8</b> Mixed                                                                  | 4      |        |        | 1      | 1      | 1      | 1      |        |        | 3      |
| <b>9</b> CK <sup>low</sup> HR <sup>low</sup> mixed                              | 7      |        |        | 3      | 3      |        | 2      | 2      |        | 1      |
| <b>10</b> Epithelial <sup>low</sup> mixed                                       | 11     | 1      |        | 3      | 4      | 1      |        | 4      |        |        |
| <b>11</b> CK7 <sup>+</sup>                                                      | 16     |        |        | 3      | 4      |        | 1      | 3      | 1      | 3      |
| <b>12</b> CK7 <sup>+</sup> CK <sup>hi</sup> E/P-Cadherin <sup>hi</sup>          | 11     |        |        | 2      |        |        |        |        | 1      |        |
| <b>13</b> Basal CK                                                              | 7      |        |        |        | 2      | 1      |        |        |        | 2      |
| <b>14</b> Proliferative                                                         | 5      |        |        |        | 3      | 1      | 1      |        | 1      |        |
| <b>15</b> EGFR <sup>+</sup> p53 <sup>+</sup>                                    | 5      |        |        | 1      |        |        | 2      |        |        |        |
| <b>16</b> Apoptotic                                                             | 6      |        |        |        | 4      |        |        |        |        |        |
| <b>17</b> Hypoxic                                                               | 4      |        |        | 2      | 3      |        |        |        |        |        |
| <b>18</b> CK <sup>-</sup> HR <sup>hi</sup> p53 <sup>+</sup>                     | 1      |        |        |        |        |        | 1      | 1      |        |        |

| <b>Single-Cell Pathology<br/>Patient Group</b>                                  | <b>PTNM_N<br/>3b</b> | <b>Clinical Type<br/>HR+HER2+</b> | <b>Clinical Type<br/>HR+HER2-</b> | <b>Clinical Type<br/>HR-HER2+</b> | <b>Clinical Type<br/>Triple Negative</b> | <b>Clinical Type<br/>NA</b> | <b>Patient Status<br/>Alive</b> |
|---------------------------------------------------------------------------------|----------------------|-----------------------------------|-----------------------------------|-----------------------------------|------------------------------------------|-----------------------------|---------------------------------|
| <b>1</b> CK <sup>+</sup> Hr <sup>hi</sup>                                       |                      | 2                                 | 15                                |                                   |                                          |                             | 10                              |
| <b>2</b> CK <sup>+</sup> HR <sup>+</sup>                                        |                      | 7                                 | 10                                | 1                                 | 2                                        | 1                           | 13                              |
| <b>3</b> CK <sup>+</sup> HR <sup>hi</sup> & CK <sup>low</sup> HR <sup>low</sup> |                      | 1                                 | 18                                |                                   |                                          | 1                           | 10                              |
| <b>4</b> CK <sup>+</sup> HR <sup>low</sup>                                      |                      | 1                                 | 10                                |                                   | 1                                        |                             | 7                               |
| <b>5</b> CK <sup>+</sup> HR <sup>low</sup> mixed                                |                      | 1                                 | 30                                |                                   |                                          | 1                           | 23                              |
| <b>6</b> CK <sup>low</sup> HR <sup>low</sup> Large                              |                      | 2                                 | 8                                 |                                   |                                          |                             | 5                               |
| <b>7</b> Epithelial <sup>low</sup>                                              |                      |                                   | 8                                 | 2                                 | 2                                        | 1                           | 6                               |
| <b>8</b> Mixed                                                                  |                      | 1                                 | 4                                 |                                   | 6                                        |                             | 5                               |
| <b>9</b> CK <sup>low</sup> HR <sup>low</sup> mixed                              |                      | 5                                 | 11                                | 2                                 | 2                                        |                             | 12                              |
| <b>10</b> Epithelial <sup>low</sup> mixed                                       |                      | 6                                 | 16                                | 1                                 | 1                                        |                             | 16                              |
| <b>11</b> CK7 <sup>+</sup>                                                      |                      |                                   | 19                                | 10                                | 2                                        |                             | 28                              |
| <b>12</b> CK7 <sup>+</sup> CK <sup>hi</sup> E/P-Cadherin <sup>hi</sup>          |                      | 1                                 | 11                                |                                   | 2                                        |                             | 8                               |
| <b>13</b> Basal CK                                                              | 1                    |                                   | 5                                 | 4                                 | 6                                        |                             | 10                              |
| <b>14</b> Proliferative                                                         |                      |                                   | 3                                 |                                   | 7                                        | 1                           | 6                               |
| <b>15</b> EGFR <sup>+</sup> p53 <sup>+</sup>                                    |                      |                                   |                                   |                                   | 8                                        |                             | 7                               |
| <b>16</b> Apoptotic                                                             |                      | 1                                 | 2                                 | 1                                 | 6                                        |                             | 10                              |
| <b>17</b> Hypoxic                                                               |                      | 1                                 | 3                                 | 2                                 | 3                                        |                             | 5                               |
| <b>18</b> CK <sup>-</sup> HR <sup>hi</sup> p53 <sup>+</sup>                     |                      |                                   | 2                                 |                                   |                                          | 1                           | 1                               |



| <b>Single-Cell Pathology<br/>Patient Group</b>                                  | <b>Patient Status<br/>Alive w Metastases</b> | <b>Patient Status<br/>Death</b> | <b>Patient Status<br/>Death by Primary Disease</b> | <b>Response<br/>NA</b> | <b>Response<br/>Refractory</b> | <b>Response<br/>Resistant</b> |
|---------------------------------------------------------------------------------|----------------------------------------------|---------------------------------|----------------------------------------------------|------------------------|--------------------------------|-------------------------------|
| <b>1</b> CK <sup>+</sup> Hr <sup>hi</sup>                                       | 3                                            | 4                               |                                                    | 5                      | 2                              | 3                             |
| <b>2</b> CK <sup>+</sup> HR <sup>+</sup>                                        | 4                                            |                                 | 4                                                  | 7                      | 4                              | 4                             |
| <b>3</b> CK <sup>+</sup> HR <sup>hi</sup> & CK <sup>low</sup> HR <sup>low</sup> | 2                                            | 1                               | 7                                                  | 3                      | 5                              | 5                             |
| <b>4</b> CK <sup>+</sup> HR <sup>low</sup>                                      | 1                                            | 1                               | 3                                                  | 2                      | 2                              | 3                             |
| <b>5</b> CK <sup>+</sup> HR <sup>low</sup> mixed                                | 1                                            | 3                               | 5                                                  | 6                      | 5                              | 2                             |
| <b>6</b> CK <sup>low</sup> HR <sup>low</sup> Large                              | 1                                            |                                 | 4                                                  | 3                      | 3                              | 2                             |
| <b>7</b> Epithelial <sup>low</sup>                                              | 2                                            | 1                               | 4                                                  | 4                      | 1                              | 4                             |
| <b>8</b> Mixed                                                                  |                                              |                                 | 6                                                  | 6                      | 3                              | 1                             |
| <b>9</b> CK <sup>low</sup> HR <sup>low</sup> mixed                              | 2                                            | 3                               | 3                                                  | 8                      | 2                              | 3                             |
| <b>10</b> Epithelial <sup>low</sup> mixed                                       | 2                                            | 2                               | 4                                                  | 10                     | 7                              | 1                             |
| <b>11</b> CK7 <sup>+</sup>                                                      |                                              | 2                               | 1                                                  | 16                     |                                | 2                             |
| <b>12</b> CK7 <sup>+</sup> CK <sup>hi</sup> E/P-Cadherin <sup>hi</sup>          | 1                                            | 1                               | 4                                                  | 5                      | 3                              | 2                             |
| <b>13</b> Basal CK                                                              | 1                                            | 1                               | 3                                                  | 12                     | 1                              |                               |
| <b>14</b> Proliferative                                                         |                                              | 1                               | 4                                                  | 7                      | 2                              |                               |
| <b>15</b> EGFR <sup>+</sup> p53 <sup>+</sup>                                    |                                              |                                 | 1                                                  | 8                      |                                |                               |
| <b>16</b> Apoptotic                                                             |                                              |                                 |                                                    | 7                      |                                |                               |
| <b>17</b> Hypoxic                                                               |                                              | 1                               | 3                                                  | 6                      | 2                              | 1                             |
| <b>18</b> CK <sup>-</sup> HR <sup>hi</sup> p53 <sup>+</sup>                     |                                              | 1                               | 1                                                  | 1                      | 2                              |                               |

| <b>Single-Cell Pathology<br/>Patient Group</b>                                  | <b>Response<br/>Sensitive</b> | <b>Post-surgery Treatment<br/>Anastrazol</b> | <b>Post-surgery Treatment<br/>Chemo</b> | <b>Post-surgery Treatment<br/>Chemo - Anastrazol</b> |
|---------------------------------------------------------------------------------|-------------------------------|----------------------------------------------|-----------------------------------------|------------------------------------------------------|
| <b>1</b> CK <sup>+</sup> Hr <sup>hi</sup>                                       | 7                             | 1                                            |                                         |                                                      |
| <b>2</b> CK <sup>+</sup> HR <sup>+</sup>                                        | 6                             | 2                                            | 1                                       |                                                      |
| <b>3</b> CK <sup>+</sup> HR <sup>hi</sup> & CK <sup>low</sup> HR <sup>low</sup> | 7                             | 2                                            |                                         |                                                      |
| <b>4</b> CK <sup>+</sup> HR <sup>low</sup>                                      | 5                             | 3                                            |                                         |                                                      |
| <b>5</b> CK <sup>+</sup> HR <sup>low</sup> mixed                                | 19                            | 2                                            |                                         |                                                      |
| <b>6</b> CK <sup>low</sup> HR <sup>low</sup> Large                              | 2                             | 1                                            | 1                                       | 1                                                    |
| <b>7</b> Epithelial <sup>low</sup>                                              | 4                             | 1                                            |                                         |                                                      |
| <b>8</b> Mixed                                                                  | 1                             | 1                                            | 1                                       | 1                                                    |
| <b>9</b> CK <sup>low</sup> HR <sup>low</sup> mixed                              | 7                             | 1                                            | 3                                       | 1                                                    |
| <b>10</b> Epithelial <sup>low</sup> mixed                                       | 6                             | 1                                            | 1                                       | 1                                                    |
| <b>11</b> CK7 <sup>+</sup>                                                      | 13                            | 4                                            | 6                                       | 1                                                    |
| <b>12</b> CK7 <sup>+</sup> CK <sup>hi</sup> E/P-Cadherin <sup>hi</sup>          | 4                             | 1                                            | 1                                       | 1                                                    |
| <b>13</b> Basal CK                                                              | 2                             |                                              | 5                                       |                                                      |
| <b>14</b> Proliferative                                                         | 2                             |                                              | 4                                       |                                                      |
| <b>15</b> EGFR <sup>+</sup> p53 <sup>+</sup>                                    |                               |                                              | 5                                       |                                                      |
| <b>16</b> Apoptotic                                                             | 3                             |                                              | 4                                       |                                                      |
| <b>17</b> Hypoxic                                                               |                               |                                              | 3                                       |                                                      |
| <b>18</b> CK <sup>-</sup> HR <sup>hi</sup> p53 <sup>+</sup>                     |                               |                                              |                                         |                                                      |

| <b>Single-Cell Pathology<br/>Patient Group</b>                                  | <b>Post-surgery Treatment<br/>Chemo - Hormone Therapy</b> | <b>Post-surgery Treatment<br/>Chemo - Immune Therapy</b> | <b>Post-surgery Treatment<br/>Chemo - Immune Therapy - Anastrozol</b> |
|---------------------------------------------------------------------------------|-----------------------------------------------------------|----------------------------------------------------------|-----------------------------------------------------------------------|
| <b>1</b> CK <sup>+</sup> Hr <sup>hi</sup>                                       | 1                                                         |                                                          | 1                                                                     |
| <b>2</b> CK <sup>+</sup> HR <sup>+</sup>                                        | 1                                                         |                                                          |                                                                       |
| <b>3</b> CK <sup>+</sup> HR <sup>hi</sup> & CK <sup>low</sup> HR <sup>low</sup> |                                                           |                                                          |                                                                       |
| <b>4</b> CK <sup>+</sup> HR <sup>low</sup>                                      | 1                                                         |                                                          |                                                                       |
| <b>5</b> CK <sup>+</sup> HR <sup>low</sup> mixed                                | 1                                                         |                                                          |                                                                       |
| <b>6</b> CK <sup>low</sup> HR <sup>low</sup> Large                              |                                                           |                                                          |                                                                       |
| <b>7</b> Epithelial <sup>low</sup>                                              | 1                                                         | 1                                                        |                                                                       |
| <b>8</b> Mixed                                                                  |                                                           |                                                          |                                                                       |
| <b>9</b> CK <sup>low</sup> HR <sup>low</sup> mixed                              | 1                                                         |                                                          |                                                                       |
| <b>10</b> Epithelial <sup>low</sup> mixed                                       |                                                           |                                                          | 1                                                                     |
| <b>11</b> CK7 <sup>+</sup>                                                      |                                                           | 2                                                        |                                                                       |
| <b>12</b> CK7 <sup>+</sup> CK <sup>hi</sup> E/P-Cadherin <sup>hi</sup>          | 1                                                         |                                                          |                                                                       |
| <b>13</b> Basal CK                                                              |                                                           | 2                                                        |                                                                       |
| <b>14</b> Proliferative                                                         |                                                           |                                                          |                                                                       |
| <b>15</b> EGFR <sup>+</sup> p53 <sup>+</sup>                                    |                                                           |                                                          |                                                                       |
| <b>16</b> Apoptotic                                                             |                                                           | 1                                                        |                                                                       |
| <b>17</b> Hypoxic                                                               |                                                           | 1                                                        |                                                                       |
| <b>18</b> CK <sup>-</sup> HR <sup>hi</sup> p53 <sup>+</sup>                     |                                                           |                                                          |                                                                       |

| <b>Single-Cell Pathology<br/>Patient Group</b>                                  | <b>Post-surgery Treatment<br/>Chemo - Immune Therapy - Tamoxifen</b> | <b>Post-surgery Treatment<br/>Chemo - Letrozol</b> | <b>Post-surgery Treatment<br/>Chemo - Tamoxifen</b> |
|---------------------------------------------------------------------------------|----------------------------------------------------------------------|----------------------------------------------------|-----------------------------------------------------|
| <b>1</b> CK <sup>+</sup> Hr <sup>hi</sup>                                       |                                                                      | 2                                                  |                                                     |
| <b>2</b> CK <sup>+</sup> HR <sup>+</sup>                                        |                                                                      |                                                    | 3                                                   |
| <b>3</b> CK <sup>+</sup> HR <sup>hi</sup> & CK <sup>low</sup> HR <sup>low</sup> |                                                                      |                                                    | 4                                                   |
| <b>4</b> CK <sup>+</sup> HR <sup>low</sup>                                      |                                                                      |                                                    | 1                                                   |
| <b>5</b> CK <sup>+</sup> HR <sup>low</sup> mixed                                |                                                                      |                                                    | 5                                                   |
| <b>6</b> CK <sup>low</sup> HR <sup>low</sup> Large                              |                                                                      |                                                    | 1                                                   |
| <b>7</b> Epithelial <sup>low</sup>                                              |                                                                      | 1                                                  | 2                                                   |
| <b>8</b> Mixed                                                                  |                                                                      |                                                    | 2                                                   |
| <b>9</b> CK <sup>low</sup> HR <sup>low</sup> mixed                              | 1                                                                    | 1                                                  | 1                                                   |
| <b>10</b> Epithelial <sup>low</sup> mixed                                       |                                                                      | 2                                                  | 3                                                   |
| <b>11</b> CK7 <sup>+</sup>                                                      |                                                                      | 1                                                  | 1                                                   |
| <b>12</b> CK7 <sup>+</sup> CK <sup>hi</sup> E/P-Cadherin <sup>hi</sup>          |                                                                      |                                                    | 1                                                   |
| <b>13</b> Basal CK                                                              |                                                                      |                                                    |                                                     |
| <b>14</b> Proliferative                                                         |                                                                      |                                                    |                                                     |
| <b>15</b> EGFR <sup>+</sup> p53 <sup>+</sup>                                    |                                                                      |                                                    |                                                     |
| <b>16</b> Apoptotic                                                             |                                                                      |                                                    |                                                     |
| <b>17</b> Hypoxic                                                               |                                                                      |                                                    | 2                                                   |
| <b>18</b> CK <sup>-</sup> HR <sup>hi</sup> p53 <sup>+</sup>                     |                                                                      |                                                    |                                                     |

| <b>Single-Cell Pathology<br/>Patient Group</b>                                  | <b>Post-surgery Treatment<br/>Exemestan</b> | <b>Post-surgery Treatment<br/>Hormone Therapy</b> | <b>Post-surgery Treatment<br/>Immune Therapy</b> | <b>Post-surgery Treatment<br/>Immune Therapy - Anastrozol</b> |
|---------------------------------------------------------------------------------|---------------------------------------------|---------------------------------------------------|--------------------------------------------------|---------------------------------------------------------------|
| <b>1</b> CK <sup>+</sup> Hr <sup>hi</sup>                                       |                                             | 1                                                 |                                                  |                                                               |
| <b>2</b> CK <sup>+</sup> HR <sup>+</sup>                                        |                                             | 7                                                 |                                                  |                                                               |
| <b>3</b> CK <sup>+</sup> HR <sup>hi</sup> & CK <sup>low</sup> HR <sup>low</sup> |                                             | 6                                                 |                                                  |                                                               |
| <b>4</b> CK <sup>+</sup> HR <sup>low</sup>                                      |                                             | 1                                                 |                                                  |                                                               |
| <b>5</b> CK <sup>+</sup> HR <sup>low</sup> mixed                                | 1                                           | 1                                                 |                                                  |                                                               |
| <b>6</b> CK <sup>low</sup> HR <sup>low</sup> Large                              |                                             |                                                   |                                                  |                                                               |
| <b>7</b> Epithelial <sup>low</sup>                                              |                                             | 1                                                 | 1                                                |                                                               |
| <b>8</b> Mixed                                                                  |                                             |                                                   |                                                  |                                                               |
| <b>9</b> CK <sup>low</sup> HR <sup>low</sup> mixed                              |                                             |                                                   |                                                  |                                                               |
| <b>10</b> Epithelial <sup>low</sup> mixed                                       |                                             |                                                   | 1                                                | 1                                                             |
| <b>11</b> CK7 <sup>+</sup>                                                      |                                             |                                                   | 3                                                |                                                               |
| <b>12</b> CK7 <sup>+</sup> CK <sup>hi</sup> E/P-Cadherin <sup>hi</sup>          |                                             | 1                                                 |                                                  |                                                               |
| <b>13</b> Basal CK                                                              |                                             |                                                   | 1                                                |                                                               |
| <b>14</b> Proliferative                                                         |                                             | 1                                                 |                                                  |                                                               |
| <b>15</b> EGFR <sup>+</sup> p53 <sup>+</sup>                                    |                                             |                                                   |                                                  |                                                               |
| <b>16</b> Apoptotic                                                             |                                             | 2                                                 |                                                  |                                                               |
| <b>17</b> Hypoxic                                                               |                                             |                                                   |                                                  |                                                               |
| <b>18</b> CK <sup>-</sup> HR <sup>hi</sup> p53 <sup>+</sup>                     |                                             | 1                                                 |                                                  |                                                               |

| <b>Single-Cell Pathology<br/>Patient Group</b>                                  | <b>Post-surgery Treatment<br/>Letrozol</b> | <b>Post-surgery Treatment<br/>Tamoxifen</b> | <b>Post-surgery Treatment<br/>Tamoxifen - Femara</b> | <b>Post-surgery Treatment<br/>None</b> |
|---------------------------------------------------------------------------------|--------------------------------------------|---------------------------------------------|------------------------------------------------------|----------------------------------------|
| <b>1</b> CK <sup>+</sup> Hr <sup>hi</sup>                                       | 1                                          | 9                                           |                                                      | 1                                      |
| <b>2</b> CK <sup>+</sup> HR <sup>+</sup>                                        | 1                                          | 2                                           |                                                      | 3                                      |
| <b>3</b> CK <sup>+</sup> HR <sup>hi</sup> & CK <sup>low</sup> HR <sup>low</sup> |                                            | 8                                           |                                                      |                                        |
| <b>4</b> CK <sup>+</sup> HR <sup>low</sup>                                      | 1                                          | 4                                           |                                                      | 1                                      |
| <b>5</b> CK <sup>+</sup> HR <sup>low</sup> mixed                                | 1                                          | 20                                          |                                                      | 1                                      |
| <b>6</b> CK <sup>low</sup> HR <sup>low</sup> Large                              |                                            | 6                                           |                                                      |                                        |
| <b>7</b> Epithelial <sup>low</sup>                                              | 1                                          | 2                                           |                                                      | 1                                      |
| <b>8</b> Mixed                                                                  |                                            | 2                                           |                                                      | 2                                      |
| <b>9</b> CK <sup>low</sup> HR <sup>low</sup> mixed                              |                                            | 8                                           |                                                      | 1                                      |
| <b>10</b> Epithelial <sup>low</sup> mixed                                       |                                            | 11                                          | 1                                                    | 1                                      |
| <b>11</b> CK7 <sup>+</sup>                                                      | 1                                          | 9                                           |                                                      | 2                                      |
| <b>12</b> CK7 <sup>+</sup> CK <sup>hi</sup> E/P-Cadherin <sup>hi</sup>          |                                            | 7                                           |                                                      |                                        |
| <b>13</b> Basal CK                                                              | 1                                          | 2                                           |                                                      | 3                                      |
| <b>14</b> Proliferative                                                         |                                            | 3                                           |                                                      | 2                                      |
| <b>15</b> EGFR <sup>+</sup> p53 <sup>+</sup>                                    |                                            |                                             |                                                      |                                        |
| <b>16</b> Apoptotic                                                             |                                            | 2                                           |                                                      | 1                                      |
| <b>17</b> Hypoxic                                                               | 1                                          |                                             |                                                      | 1                                      |
| <b>18</b> CK <sup>-</sup> HR <sup>hi</sup> p53 <sup>+</sup>                     |                                            | 1                                           |                                                      |                                        |

| <b>Single-Cell Pathology<br/>Patient Group</b>                                  | <b>Pre-surgery Treatment<br/>Neoadjuvant Chemo</b> | <b>Pre-surgery Treatment<br/>None</b> |
|---------------------------------------------------------------------------------|----------------------------------------------------|---------------------------------------|
| <b>1</b> CK <sup>+</sup> Hr <sup>hi</sup>                                       |                                                    | 17                                    |
| <b>2</b> CK <sup>+</sup> HR <sup>+</sup>                                        |                                                    | 21                                    |
| <b>3</b> CK <sup>+</sup> HR <sup>hi</sup> & CK <sup>low</sup> HR <sup>low</sup> |                                                    | 20                                    |
| <b>4</b> CK <sup>+</sup> HR <sup>low</sup>                                      |                                                    | 12                                    |
| <b>5</b> CK <sup>+</sup> HR <sup>low</sup> mixed                                |                                                    | 32                                    |
| <b>6</b> CK <sup>low</sup> HR <sup>low</sup> Large                              |                                                    | 10                                    |
| <b>7</b> Epithelial <sup>low</sup>                                              |                                                    | 13                                    |
| <b>8</b> Mixed                                                                  | 1                                                  | 10                                    |
| <b>9</b> CK <sup>low</sup> HR <sup>low</sup> mixed                              |                                                    | 20                                    |
| <b>10</b> Epithelial <sup>low</sup> mixed                                       |                                                    | 24                                    |
| <b>11</b> CK7 <sup>+</sup>                                                      |                                                    | 31                                    |
| <b>12</b> CK7 <sup>+</sup> CK <sup>hi</sup> E/P-Cadherin <sup>hi</sup>          |                                                    | 14                                    |
| <b>13</b> Basal CK                                                              |                                                    | 15                                    |
| <b>14</b> Proliferative                                                         |                                                    | 11                                    |
| <b>15</b> EGFR <sup>+</sup> p53 <sup>+</sup>                                    |                                                    | 8                                     |
| <b>16</b> Apoptotic                                                             |                                                    | 10                                    |
| <b>17</b> Hypoxic                                                               |                                                    | 9                                     |
| <b>18</b> CK <sup>-</sup> HR <sup>hi</sup> p53 <sup>+</sup>                     | 1                                                  | 2                                     |





d)

| Single-Cell Pathology                                                    |     | Logrank Group vs All Others |          |                       |                       |       | Chisq | DF     | P |
|--------------------------------------------------------------------------|-----|-----------------------------|----------|-----------------------|-----------------------|-------|-------|--------|---|
| Patient Group                                                            | N   | Observed                    | Expected | (O-E) <sup>2</sup> /E | (O-E) <sup>2</sup> /V |       |       |        |   |
| 1 CK <sup>+</sup> HR <sup>hi</sup>                                       | 17  | 0                           | 4.25     | 4.25                  | 4.25                  | 4.60  | 1     | 0.0300 |   |
|                                                                          | 261 | 56                          | 51.75    | 0.35                  | 0.35                  |       |       |        |   |
| 2 CK <sup>+</sup> HR <sup>+</sup>                                        | 21  | 4                           | 4.78     | 0.13                  | 0.14                  | 0.10  | 1     | 0.7000 |   |
|                                                                          | 257 | 52                          | 51.22    | 0.01                  | 0.14                  |       |       |        |   |
| 3 CK <sup>+</sup> HR <sup>hi</sup> & CK <sup>low</sup> HR <sup>low</sup> | 20  | 7                           | 4.84     | 0.97                  | 1.07                  | 1.10  | 1     | 0.3000 |   |
|                                                                          | 258 | 49                          | 51.16    | 0.09                  | 1.07                  |       |       |        |   |
| 4 CK <sup>+</sup> HR <sup>low</sup>                                      | 12  | 3                           | 2.14     | 0.35                  | 0.36                  | 0.40  | 1     | 0.5000 |   |
|                                                                          | 266 | 53                          | 53.86    | 0.01                  | 0.36                  |       |       |        |   |
| 5 CK <sup>+</sup> HR <sup>low</sup> mixed                                | 32  | 5                           | 8.70     | 1.57                  | 1.90                  | 1.90  | 1     | 0.2000 |   |
|                                                                          | 246 | 51                          | 47.30    | 0.29                  | 1.90                  |       |       |        |   |
| 6 CK <sup>low</sup> HR <sup>low</sup>                                    | 10  | 4                           | 1.76     | 2.86                  | 2.97                  | 3.00  | 1     | 0.0800 |   |
|                                                                          | 268 | 52                          | 54.24    | 0.09                  | 2.97                  |       |       |        |   |
| 7 Epithelial <sup>low</sup>                                              | 13  | 4                           | 2.65     | 0.69                  | 0.73                  | 0.70  | 1     | 0.4000 |   |
|                                                                          | 265 | 52                          | 53.35    | 0.03                  | 0.73                  |       |       |        |   |
| 8 mixed                                                                  | 11  | 6                           | 1.55     | 12.74                 | 13.20                 | 13.20 | 1     | 0.0003 |   |
|                                                                          | 267 | 50                          | 54.45    | 0.36                  | 13.20                 |       |       |        |   |
| 9 CK <sup>low</sup> HR <sup>low</sup> mixed                              | 20  | 3                           | 3.66     | 0.12                  | 0.13                  | 0.10  | 1     | 0.7000 |   |
|                                                                          | 258 | 53                          | 52.34    | 0.01                  | 0.13                  |       |       |        |   |
| 10 Epithelial <sup>low</sup> mixed                                       | 24  | 4                           | 5.36     | 0.34                  | 0.38                  | 0.40  | 1     | 0.5000 |   |
|                                                                          | 254 | 52                          | 50.64    | 0.03                  | 0.38                  |       |       |        |   |
| 11 CK7 <sup>+</sup>                                                      | 31  | 1                           | 6.51     | 4.67                  | 5.31                  | 5.30  | 1     | 0.0200 |   |
|                                                                          | 247 | 55                          | 49.49    | 0.61                  | 5.31                  |       |       |        |   |
| 12 CK7 <sup>+</sup> CK <sup>hi</sup> E/P-Cadherin <sup>hi</sup>          | 14  | 4                           | 1.87     | 2.42                  | 2.54                  | 2.50  | 1     | 0.1000 |   |
|                                                                          | 264 | 52                          | 54.13    | 0.08                  | 2.54                  |       |       |        |   |
| 13 Basal CK                                                              | 15  | 3                           | 2.80     | 0.01                  | 0.02                  | 0.00  | 1     | 0.9000 |   |
|                                                                          | 263 | 53                          | 53.20    | 0.00                  | 0.02                  |       |       |        |   |
| 14 Proliferative                                                         | 11  | 4                           | 1.47     | 4.34                  | 4.49                  | 4.50  | 1     | 0.0300 |   |
|                                                                          | 267 | 52                          | 54.53    | 0.12                  | 4.49                  |       |       |        |   |
| 15 EGFR <sup>+</sup> p53 <sup>+</sup>                                    | 8   | 1                           | 0.61     | 0.25                  | 0.25                  | 0.30  | 1     | 0.6000 |   |
|                                                                          | 270 | 55                          | 55.39    | 0.00                  | 0.25                  |       |       |        |   |
| 16 Apoptotic                                                             | 10  | 0                           | 1.83     | 1.83                  | 1.91                  | 1.90  | 1     | 0.2000 |   |
|                                                                          | 268 | 56                          | 54.17    | 0.06                  | 1.91                  |       |       |        |   |
| 17 Hypoxic                                                               | 9   | 3                           | 1.22     | 2.61                  | 2.70                  | 2.70  | 1     | 0.1000 |   |
|                                                                          | 269 | 53                          | 54.78    | 0.06                  | 2.70                  |       |       |        |   |
| 18 CK <sup>-</sup> HR <sup>hi</sup> p53 <sup>+</sup> excluded            | NA  | NA                          | NA       | NA                    | NA                    | NA    | NA    | NA     |   |
|                                                                          | NA  | NA                          | NA       | NA                    | NA                    |       |       |        |   |

e)

| Single-Cell Pathology |    | Logrank Group vs Similar Groups |          |                       |                       |      | Chisq | DF     | P |
|-----------------------|----|---------------------------------|----------|-----------------------|-----------------------|------|-------|--------|---|
| Patient Groups        | N  | Observed                        | Expected | (O-E) <sup>2</sup> /E | (O-E) <sup>2</sup> /V |      |       |        |   |
| 1 vs<br>2,3           | 17 | 0                               | 3.23     | 3.23                  | 4.58                  | 4.60 | 1     | 0.0300 |   |
|                       | 41 | 11                              | 7.77     | 1.34                  | 4.58                  |      |       |        |   |
| 3 vs<br>1,2           | 20 | 7                               | 3.87     | 2.52                  | 3.91                  | 3.90 | 1     | 0.0500 |   |
|                       | 38 | 4                               | 7.13     | 1.37                  | 3.91                  |      |       |        |   |
| 16 vs<br>13,14,15,17  | 10 | 0                               | 2.56     | 2.56                  | 3.36                  | 3.40 | 1     | 0.0700 |   |
|                       | 43 | 11                              | 8.44     | 0.78                  | 3.36                  |      |       |        |   |
| 11 vs<br>12           | 31 | 1                               | 3.79     | 2.05                  | 8.67                  | 8.70 | 1     | 0.0030 |   |
|                       | 14 | 4                               | 1.21     | 6.43                  | 8.67                  |      |       |        |   |

f)

| Single-Cell Pathology              |     | Logrank within HR+HER2-, Group vs All Others |          |                       |                       |      | Chisq | DF     | P |
|------------------------------------|-----|----------------------------------------------|----------|-----------------------|-----------------------|------|-------|--------|---|
| Patient Group                      | N   | Observed                                     | Expected | (O-E) <sup>2</sup> /E | (O-E) <sup>2</sup> /V |      |       |        |   |
| 1 CK <sup>+</sup> HR <sup>hi</sup> | 15  | 0                                            | 2.69     | 2.69                  | 3.00                  | 3.00 | 1     | 0.0800 |   |
|                                    | 158 | 29                                           | 26.31    | 0.28                  | 3.00                  |      |       |        |   |





Supplementary Table 6

a)

**Stromal Environment** Coxph **Group vs All Others**, n = 275, number of events = 56

| Patient Group | Nr. Patients | coef   | exp(coef) | se(coef) | lower .95 | upper .95 | z     | Pr(> z ) |
|---------------|--------------|--------|-----------|----------|-----------|-----------|-------|----------|
| 1             | 49           | -0.28  | 0.76      | 0.37     | 0.37      | 1.55      | -0.76 | 0.4490   |
| 2             | 88           | -0.15  | 0.86      | 0.29     | 0.49      | 1.52      | -0.51 | 0.6070   |
| 3             | 9            | 0.74   | 2.09      | 0.59     | 0.65      | 6.69      | 1.24  | 0.2160   |
| 4             | 24           | 0.38   | 1.47      | 0.43     | 0.63      | 3.43      | 0.89  | 0.3750   |
| 5             | 25           | -0.97  | 0.38      | 0.72     | 0.09      | 1.56      | -1.34 | 0.1800   |
| 6             | 24           | 0.64   | 1.90      | 0.36     | 0.93      | 3.87      | 1.75  | 0.0795   |
| 7             | 8            | 0.26   | 1.30      | 0.72     | 0.32      | 5.35      | 0.37  | 0.7140   |
| 8             | 14           | 0.43   | 1.53      | 0.59     | 0.48      | 4.91      | 0.72  | 0.4740   |
| 9             | 14           | -0.24  | 0.79      | 0.72     | 0.19      | 3.24      | -0.33 | 0.7410   |
| 10            | 18           | -0.34  | 0.71      | 0.72     | 0.17      | 2.93      | -0.47 | 0.6370   |
| 11            | 2            | -15.01 | 0.00      | 3528.00  | 0.00      | Inf       | 0.00  | NA       |

b)

**Stromal Environment** Logrank **Group vs All Others**

| Patient Group | N   | Observed | Expected | (O-E)^2/E | (O-E)^2/V | Chisq | DF | P      |
|---------------|-----|----------|----------|-----------|-----------|-------|----|--------|
| 1             | 49  | 9        | 11.30    | 0.45      | 0.57      | 0.60  | 1  | 0.4000 |
|               | 226 | 47       | 44.70    | 0.11      | 0.57      |       |    |        |
| 2             | 88  | 18       | 36.20    | 0.09      | 0.27      | 0.30  | 1  | 0.6000 |
|               | 187 | 38       | 36.20    | 0.09      | 0.27      |       |    |        |
| 3             | 9   | 3        | 1.48     | 1.56      | 1.61      | 1.60  | 1  | 0.2000 |
|               | 266 | 53       | 54.52    | 0.04      | 1.61      |       |    |        |
| 4             | 24  | 6        | 4.24     | 0.74      | 0.80      | 0.80  | 1  | 0.4000 |
|               | 251 | 50       | 51.76    | 0.06      | 0.80      |       |    |        |
| 5             | 25  | 2        | 4.94     | 1.75      | 1.93      | 1.90  | 1  | 0.2000 |
|               | 250 | 54       | 51.06    | 0.17      | 1.93      |       |    |        |
| 6             | 24  | 9        | 5.16     | 2.85      | 3.16      | 3.20  | 1  | 0.0800 |
|               | 251 | 47       | 50.84    | 0.29      | 3.16      |       |    |        |
| 7             | 8   | 2        | 1.56     | 0.13      | 0.13      | 0.10  | 1  | 0.7000 |
|               | 267 | 54       | 54.44    | 0.00      | 0.13      |       |    |        |
| 8             | 14  | 3        | 2.00     | 0.50      | 0.52      | 0.50  | 1  | 0.5000 |
|               | 261 | 53       | 54.00    | 0.02      | 0.52      |       |    |        |
| 9             | 14  | 2        | 2.51     | 0.10      | 0.11      | 0.10  | 1  | 0.7000 |
|               | 261 | 54       | 53.49    | 0.00      | 0.11      |       |    |        |
| 10            | 18  | 2        | 2.76     | 0.21      | 0.22      | 0.20  | 1  | 0.6000 |
|               | 257 | 54       | 53.24    | 0.01      | 0.22      |       |    |        |
| 11            | 2   | 0        | 0.26     | 0.26      | 0.27      | 0.30  | 1  | 0.6000 |
|               | 273 | 56       | 55.74    | 0.00      | 0.27      |       |    |        |

Supplementary Table 7

a)

Stromal Environment Coxph Group vs All Others, n = 275, number of events = 89

| Patient Group | Nr. Patients | coef  | exp(coef) | se(coef) | lower .95 | upper .95 | z     | Pr(> z ) |
|---------------|--------------|-------|-----------|----------|-----------|-----------|-------|----------|
| 1             | 49           | -0.25 | 0.78      | 0.29     | 0.44      | 1.37      | -0.87 | 0.3820   |
| 2             | 88           | -0.22 | 0.80      | 0.23     | 0.51      | 1.26      | -0.97 | 0.3330   |
| 3             | 9            | 0.57  | 1.77      | 0.51     | 0.65      | 4.84      | 1.12  | 0.2650   |
| 4             | 24           | -0.01 | 0.99      | 0.39     | 0.46      | 2.14      | -0.03 | 0.9730   |
| 5             | 25           | -0.56 | 0.57      | 0.46     | 0.23      | 1.41      | -1.22 | 0.2230   |
| 6             | 24           | 0.81  | 2.26      | 0.28     | 1.30      | 3.93      | 2.87  | 0.0041   |
| 7             | 8            | 0.13  | 1.14      | 0.59     | 0.36      | 3.60      | 0.22  | 0.8260   |
| 8             | 14           | -0.16 | 0.85      | 0.59     | 0.27      | 2.71      | 0.27  | 0.7890   |
| 9             | 14           | -0.36 | 0.70      | 0.59     | 0.22      | 2.21      | -0.61 | 0.5390   |
| 10            | 18           | 0.42  | 1.52      | 0.39     | 0.70      | 3.29      | 1.06  | 0.2900   |
| 11            | 2            | 2.28  | 9.73      | 1.02     | 1.31      | 72.44     | 2.22  | 0.0263   |

b)

Stromal Environment Logrank Group vs All Others

| Patient Group | N   | Observed | Expected | (O-E)^2/E | (O-E)^2/V | Chisq | DF | P      |
|---------------|-----|----------|----------|-----------|-----------|-------|----|--------|
| 1             | 49  | 14       | 17.20    | 0.61      | 0.76      | 0.80  | 1  | 0.4000 |
|               | 226 | 75       | 71.80    | 0.15      | 0.76      |       |    |        |
| 2             | 88  | 27       | 31.40    | 0.60      | 0.94      | 0.90  | 1  | 0.3000 |
|               | 187 | 62       | 57.60    | 0.33      | 0.94      |       |    |        |
| 3             | 9   | 4        | 2.32     | 1.22      | 1.27      | 1.30  | 1  | 0.3000 |
|               | 266 | 85       | 86.68    | 0.03      | 1.27      |       |    |        |
| 4             | 24  | 7        | 7.10     | 0.00      | 0.00      | 0.00  | 1  | 1.0000 |
|               | 251 | 82       | 81.90    | 0.00      | 0.00      |       |    |        |
| 5             | 25  | 5        | 8.38     | 1.37      | 1.52      | 1.50  | 1  | 0.2000 |
|               | 250 | 84       | 80.62    | 0.14      | 1.52      |       |    |        |
| 6             | 24  | 15       | 7.35     | 7.96      | 8.74      | 8.70  | 1  | 0.0030 |
|               | 251 | 74       | 81.65    | 0.72      | 8.74      |       |    |        |
| 7             | 8   | 3        | 2.66     | 0.04      | 0.04      | 0.00  | 1  | 0.8000 |
|               | 267 | 86       | 86.34    | 0.00      | 0.04      |       |    |        |
| 8             | 14  | 3        | 3.49     | 0.07      | 0.07      | 0.10  | 1  | 0.8000 |
|               | 261 | 86       | 85.51    | 0.00      | 0.07      |       |    |        |
| 9             | 14  | 3        | 4.23     | 0.36      | 0.38      | 0.40  | 1  | 0.5000 |
|               | 261 | 86       | 84.77    | 0.02      | 0.38      |       |    |        |
| 10            | 18  | 7        | 4.76     | 1.05      | 1.12      | 1.80  | 1  | 0.2000 |
|               | 257 | 82       | 84.24    | 0.06      | 1.12      |       |    |        |
| 11            | 2   | 1        | 0.11     | 6.95      | 7.05      | 7.00  | 1  | 0.0080 |
|               | 273 | 88       | 88.89    | 0.09      | 7.05      |       |    |        |

**Supplementary Table 8**

| <b>Likelihood Ratio Tests</b> | <b>Coxph models</b>                                | <b>loglik</b> | <b>Chisq</b> | <b>DF</b> | <b>P(&gt; Chi )</b> |
|-------------------------------|----------------------------------------------------|---------------|--------------|-----------|---------------------|
| Model 1                       | Clinical Subgroups                                 | -267.30       |              |           |                     |
| Model 2                       | Clinical Subgroups + Community Densities           | -224.19       | 86.21        | 53.00     | 0.0026              |
| Model 1                       | Clinical Subgroups + Grades                        | -260.20       |              |           |                     |
| Model 2                       | Clinical Subgroups + Grades + Community Densities  | -216.87       | 86.66        | 53.00     | 0.0024              |
| Model 1                       | Grades                                             | -262.85       |              |           |                     |
| Model 2                       | Grades + Community Densities                       | -230.03       | 65.64        | 53.00     | 0.1140              |
| Model 1                       | Grades                                             | -262.85       |              |           |                     |
| Model 2                       | Grades + Clinical Subgroups                        | -260.20       | 5.30         | 4.00      | 0.2576              |
| Model 1                       | Clinical Subgroups                                 | -284.31       |              |           |                     |
| Model 2                       | Clinical Subgroups + Single-Cell Densities         | -266.62       | 35.38        | 27.00     | 0.1295              |
| Model 1                       | Clinical Subgroups + Grade                         | -278.78       |              |           |                     |
| Model 2                       | Clinical Subgroups + Grade + Single-Cell Densities | -259.80       | 37.95        | 27.00     | 0.0787              |
| Model 1                       | Clinical Subgroups                                 | -278.37       |              |           |                     |
| Model 2                       | Clinical Subgroups + SCP Groups                    | -260.36       | 36.02        | 16.00     | 0.0029              |
| Model 1                       | Clinical Subgroups + Grade                         | -272.54       |              |           |                     |
| Model 2                       | Clinical Subgroups + Grade + SCP Groups            | -256.76       | 31.56        | 16.00     | 0.0114              |

**Supplementary Table 9**

| <b>Metadata</b>  | <b>Values</b> | <b>Patient Counts/ Means</b> |
|------------------|---------------|------------------------------|
| Grade            | 1             | 19                           |
|                  | 2             | 26                           |
|                  | 3             | 27                           |
| Tumor Size [mm]  | 8 - 80        | 26.93                        |
| Age [years]      | 42 - 60       | 53.77                        |
| Gender           | Female        | 72                           |
|                  | Male          | 0                            |
| Menopausal       | Pre           | 0                            |
|                  | Post          | 72                           |
| PTNM_M           | 0             | 31                           |
|                  | 0 plus        | 2                            |
|                  | 1             | 39                           |
| PTNM_T           | 1a            | 1                            |
|                  | 1b            | 4                            |
|                  | 1c            | 27                           |
|                  | 2             | 27                           |
|                  | 3             | 9                            |
|                  | 4             | 1                            |
| PTNM_N           | 0             | 23                           |
|                  | 1             | 11                           |
|                  | 1mi           | 4                            |
|                  | 1a            | 11                           |
|                  | 2             | 1                            |
|                  | 2a            | 3                            |
|                  | 3a            | 3                            |
| ER Status        | Positive      | 51                           |
|                  | Negative      | 21                           |
| PR Status        | Positive      | 43                           |
|                  | Negative      | 29                           |
| HER2 Status      | Positive      | 14                           |
|                  | Negative      | 58                           |
| Clinical Subtype | HR+HER2+      | 12                           |
|                  | HR+HER2-      | 39                           |
|                  | HR-HER2+      | 2                            |
|                  | TripleNeg     | 9                            |
